# Supplementary material for: CuI-mediated synthesis of 1-aryl-5,6,7-trimethoxybenzimidazoles as potent antitubulin agents
Source: Royal Society of Chemistry journal article supplement (doi:10.1039/d3ra01927f), 2023-01-01

## Support Information

### CuI-mediated Synthesis of 1-Aryl-5,6,7-trimethoxybenzimidazoles as Potent Antitubulin Agents

Cong-Min Peng,<sup>a,#</sup> Shih-Wei Wang,<sup>b,c,d,#</sup> Yi-Lin Hwang,<sup>a</sup> Wen-Chun Sun,<sup>b,e</sup> Li-Pin Chiu,<sup>f,g</sup> Yi-Ting Liu,<sup>a</sup> Yu-Wei Lai,<sup>\*,h,i</sup> Hsueh-Yun Lee<sup>\*,a,j,k</sup>

#### Contents:

|                                                             |    |
|-------------------------------------------------------------|----|
| <sup>1</sup> H NMR Spectra for compounds <b>4-15</b> .....  | 2  |
| <sup>13</sup> C NMR Spectra for compounds <b>4-15</b> ..... | 14 |

# <sup>1</sup>H Spectrum for compound 4

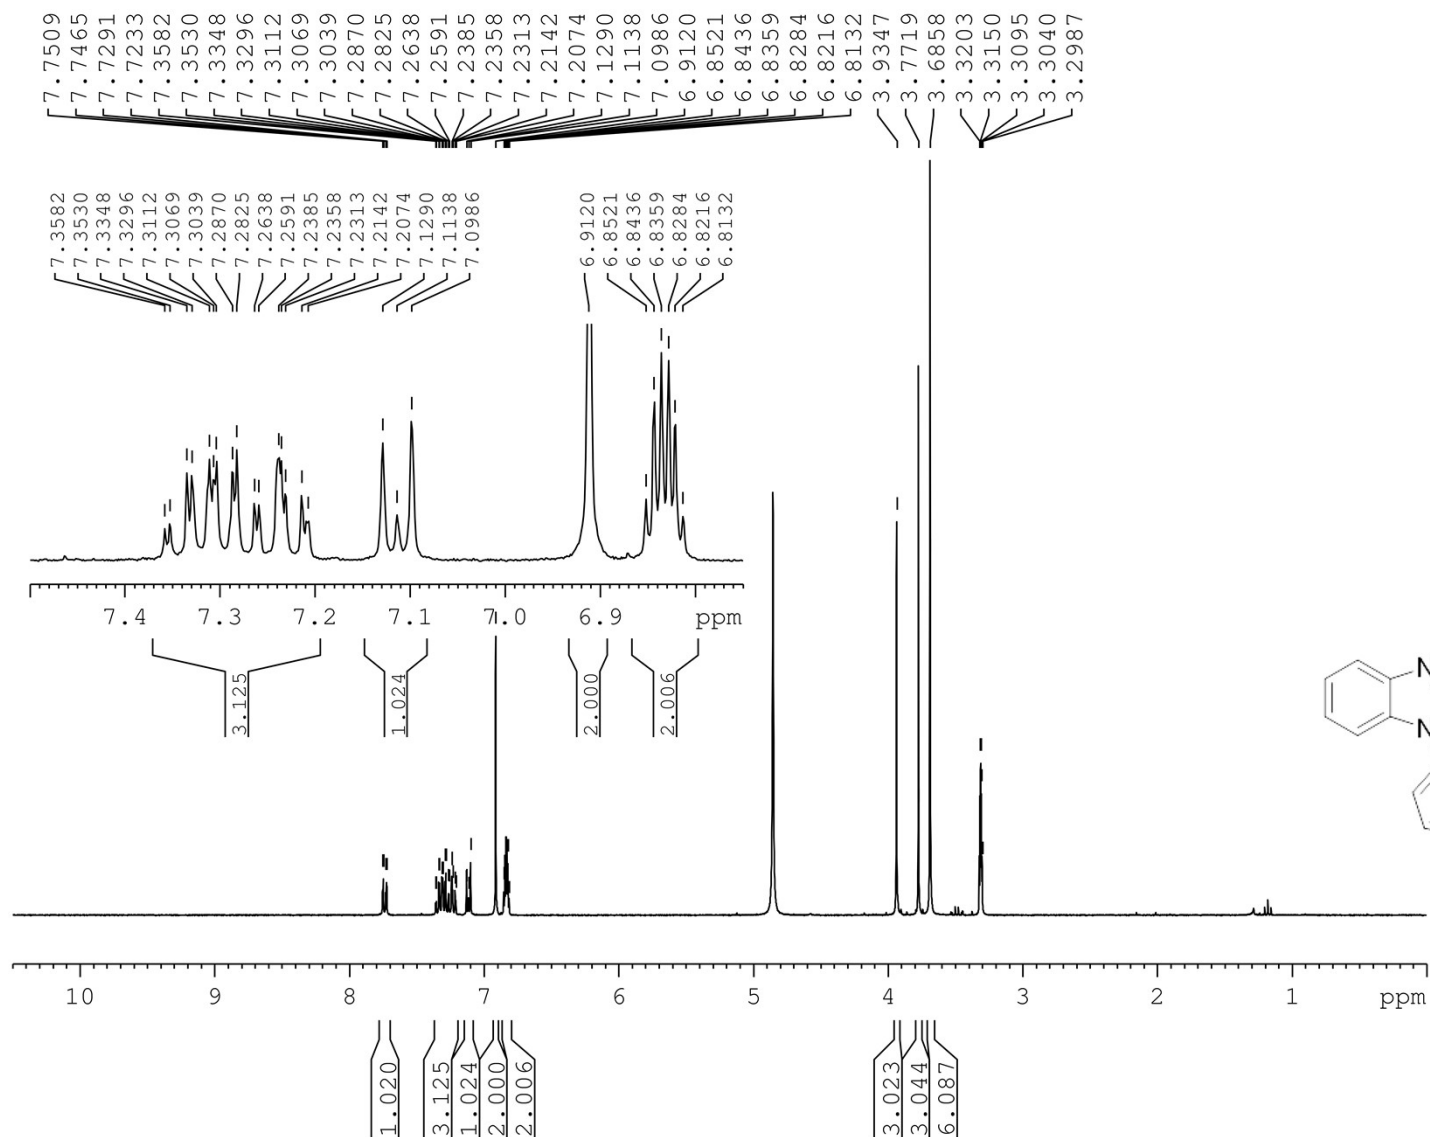

Current Data Parameters  
NAME 0415-61-222-2  
EXPNO 1  
PROCNO 1

F2 - Acquisition Parameters  
Date\_ 20190415  
Time 10.32  
INSTRUM FOURIER300  
PROBHD 5 mm DUL 13C-1  
PULPROG zg30  
TD 32768  
SOLVENT MeOD  
NS 16  
DS 0  
SWH 6103.516 Hz  
FIDRES 0.186265 Hz  
AQ 2.6843545 sec  
RG 32  
DW 81.920 usec  
DE 6.50 usec  
TE 300.0 K  
D1 2.00000000 sec  
TD0 1

===== CHANNEL f1 =====  
SFO1 300.1818011 MHz  
NUC1 1H  
P1 15.00 usec  
PLW1 5.61999989 W

F2 - Processing parameters  
SI 16384  
SF 300.1800100 MHz  
WDW no  
SSB 0  
LB 0 Hz  
GB 0  
PC 1.00

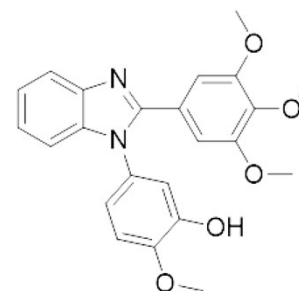

# <sup>1</sup>H Spectrum for compound 5

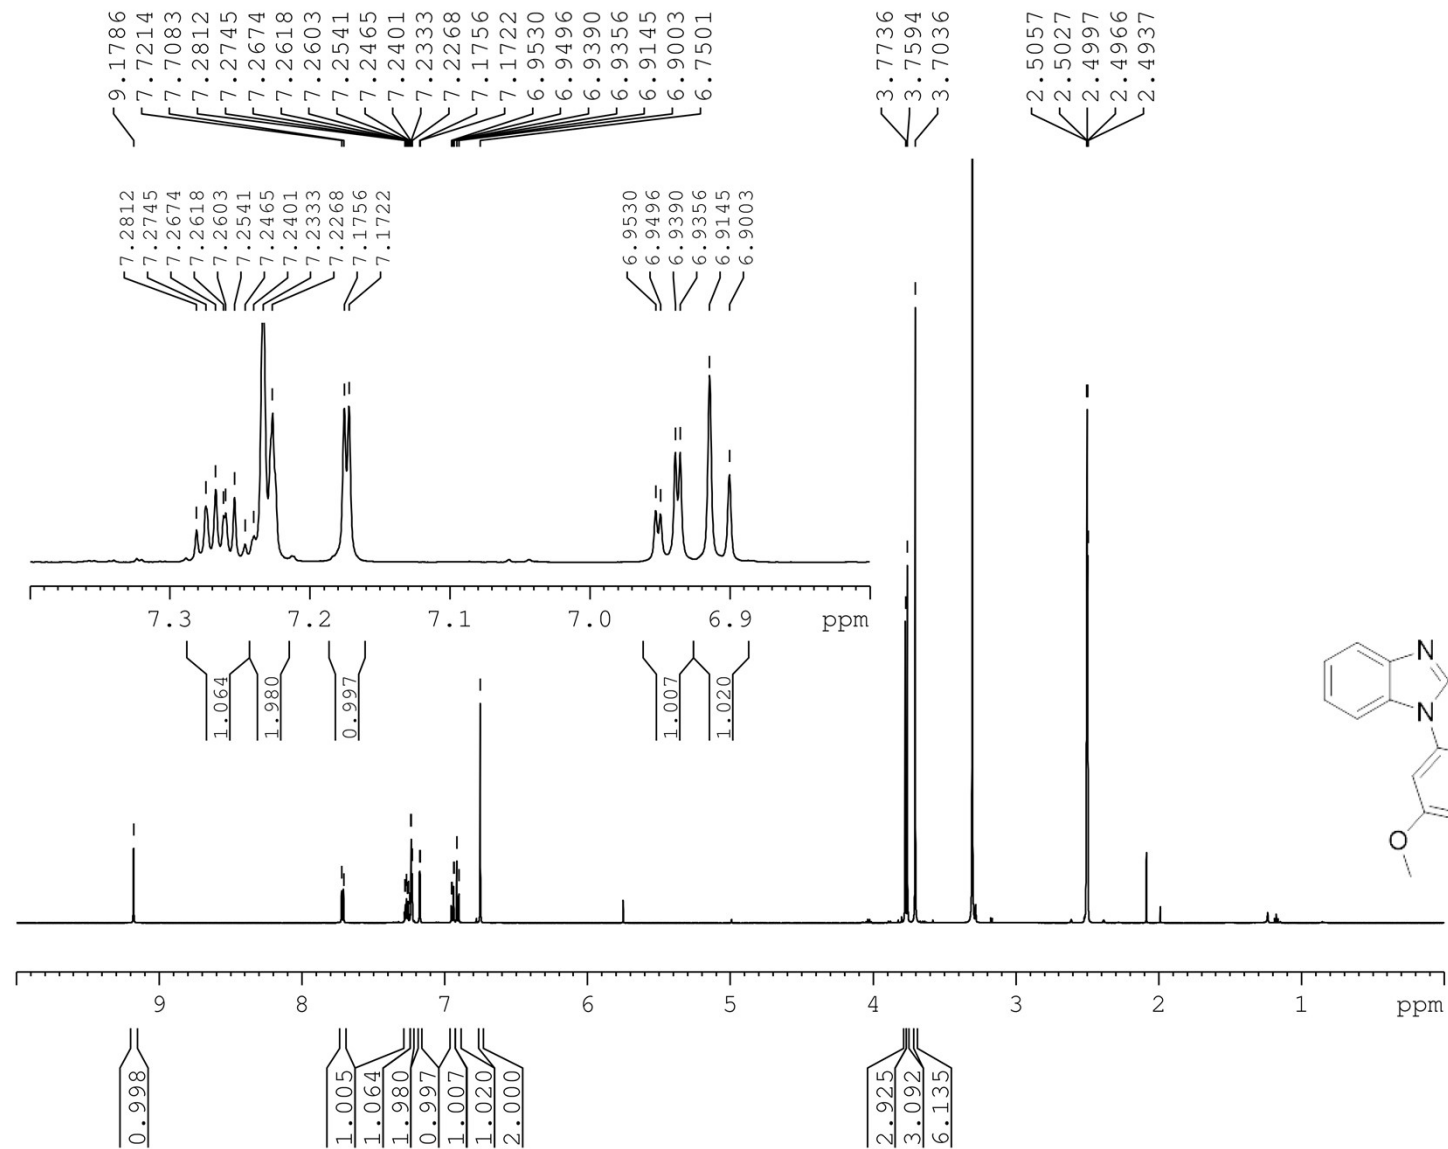

Current Data Parameters  
NAME 0705-61-161-600  
EXPNO 1  
PROCNO 1  
F2 - Processing parameters  
SI 65536  
SF 599.8294387 MHz  
WDW EM  
SSB 0  
LB 0.30 Hz  
GB 0  
PC 1.00

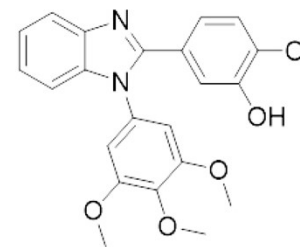

# <sup>1</sup>H Spectrum for compound 6

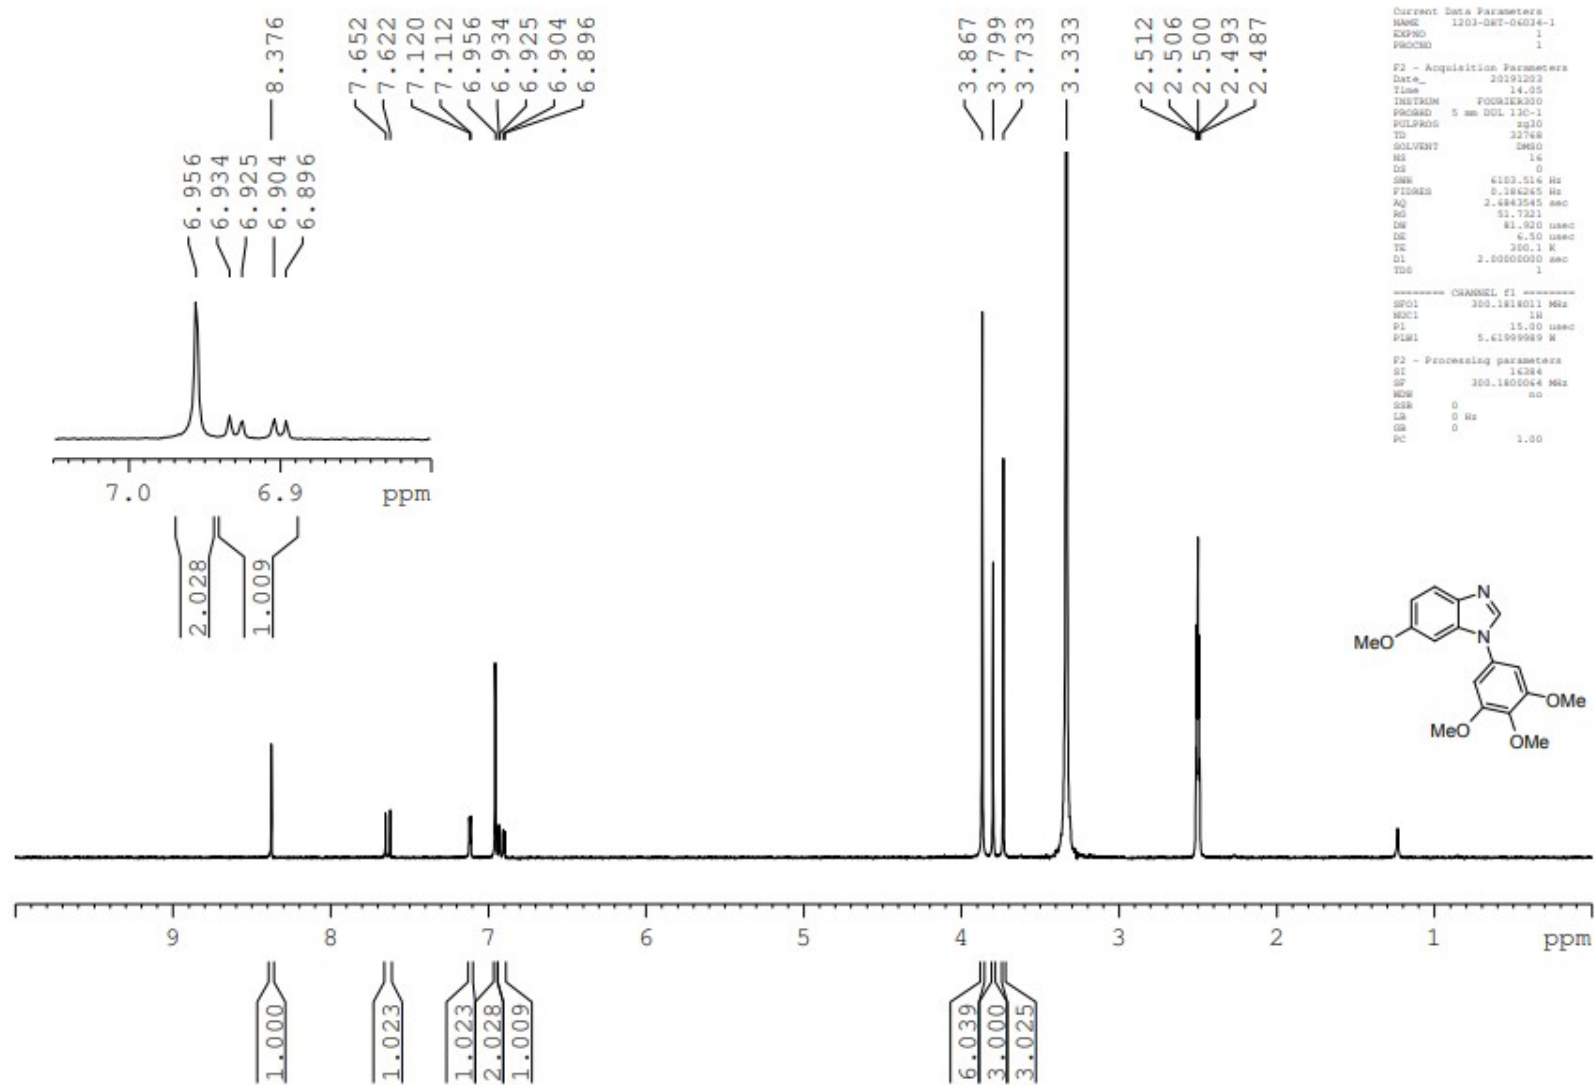

# <sup>1</sup>H Spectrum for compound 7

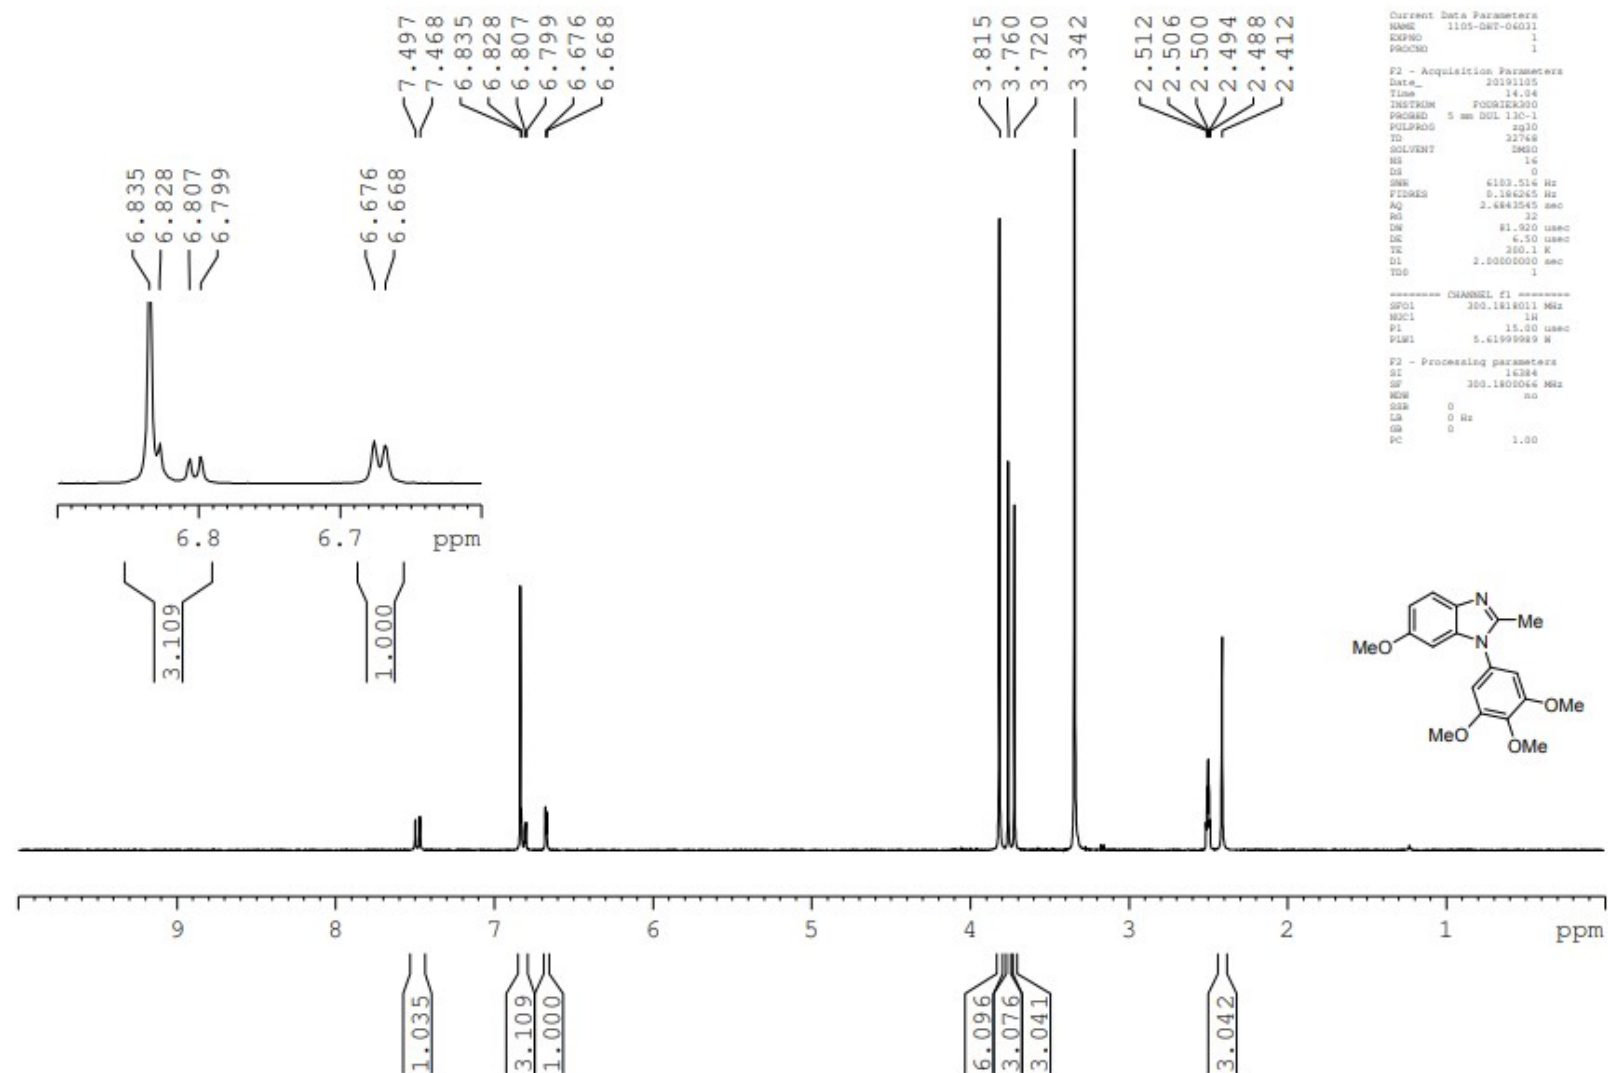

Current Data Parameters  
NAME 1105-DAT-04011  
EXPNO 1  
PROCNO 1

F2 - Acquisition Parameters  
Date\_ 20191105  
Time 14.04  
INSTRUM FOURIER300  
PROBHD 5 mm BBO 125-1  
PULPROG zg30  
TD 32768  
SOLVENT DMSO  
NS 16  
DS 0  
SWH 6103.514 Hz  
FIDRES 0.194245 Hz  
AQ 2.4842545 sec  
RG 32  
OR 81.920 usec  
DE 6.50 usec  
TE 300.1 K  
D1 2.00000000 sec  
TD0 1

===== CHANNEL F1 =====  
SFO1 300.1818011 MHz  
NUC1 1H  
P1 15.00 usec  
PLW1 5.6199989 W

F2 - Processing parameters  
SI 32768  
SF 300.1805044 MHz  
WDW no  
SSR 0  
LB 0 Hz  
GB 0  
PC 1.00

# <sup>1</sup>H Spectrum for compound 8

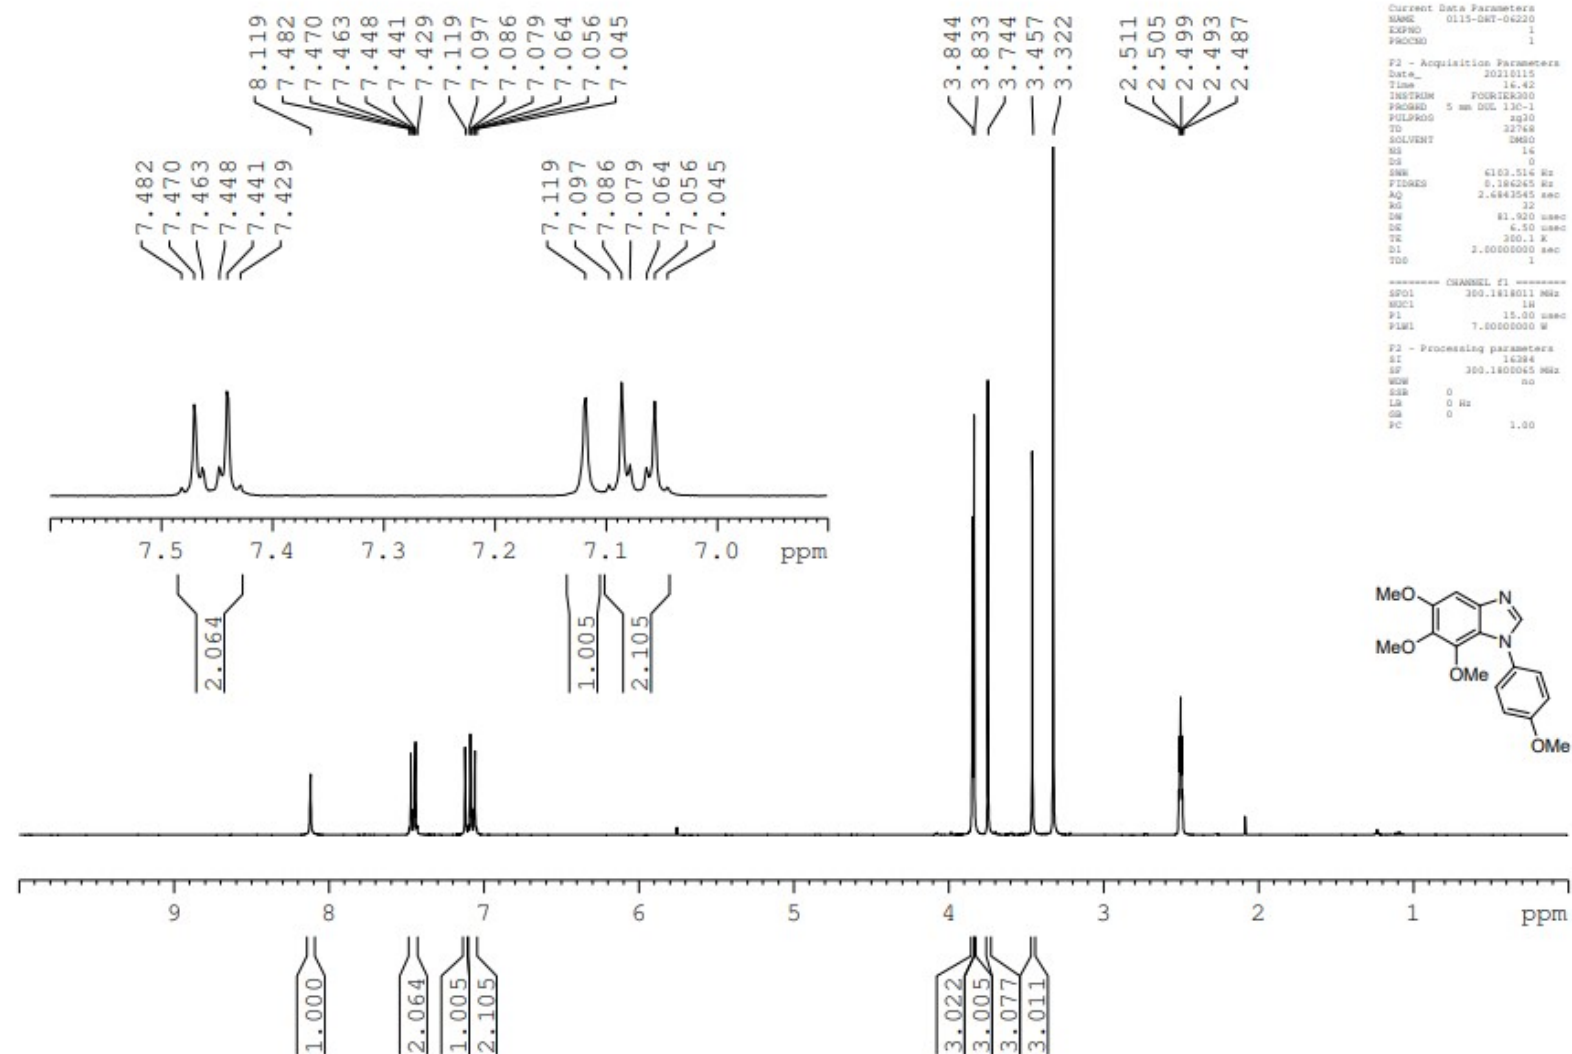

# <sup>1</sup>H Spectrum for compound 9

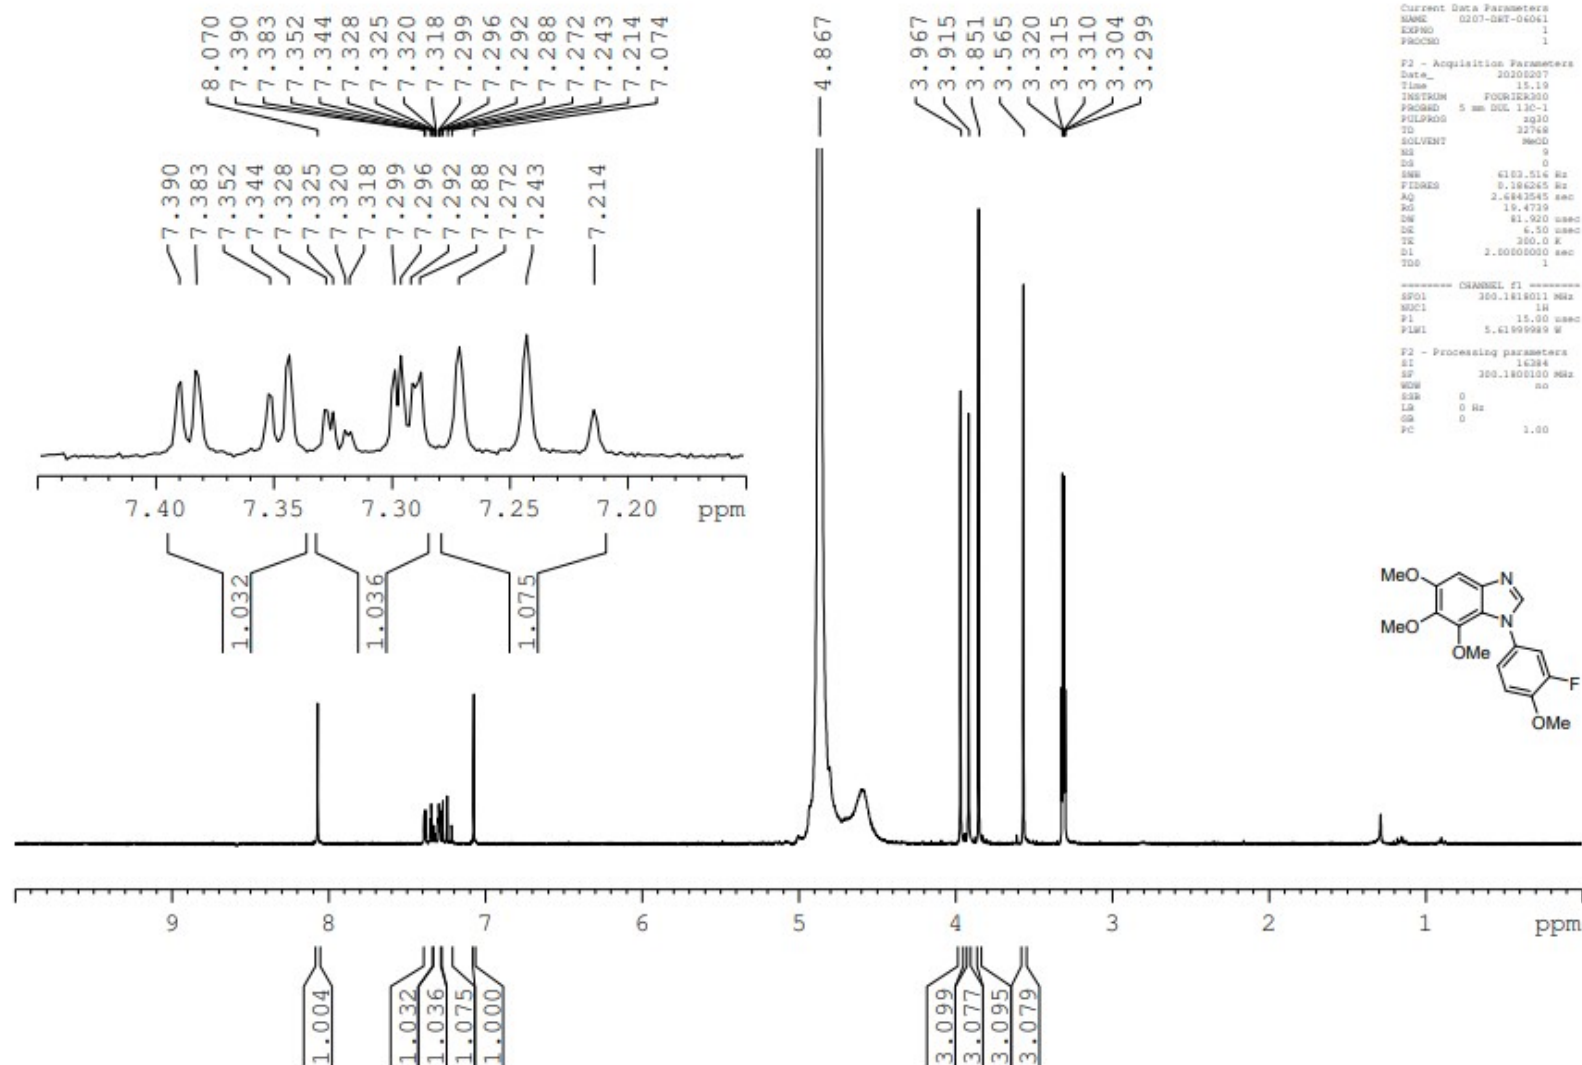

# <sup>1</sup>H Spectrum for compound 10

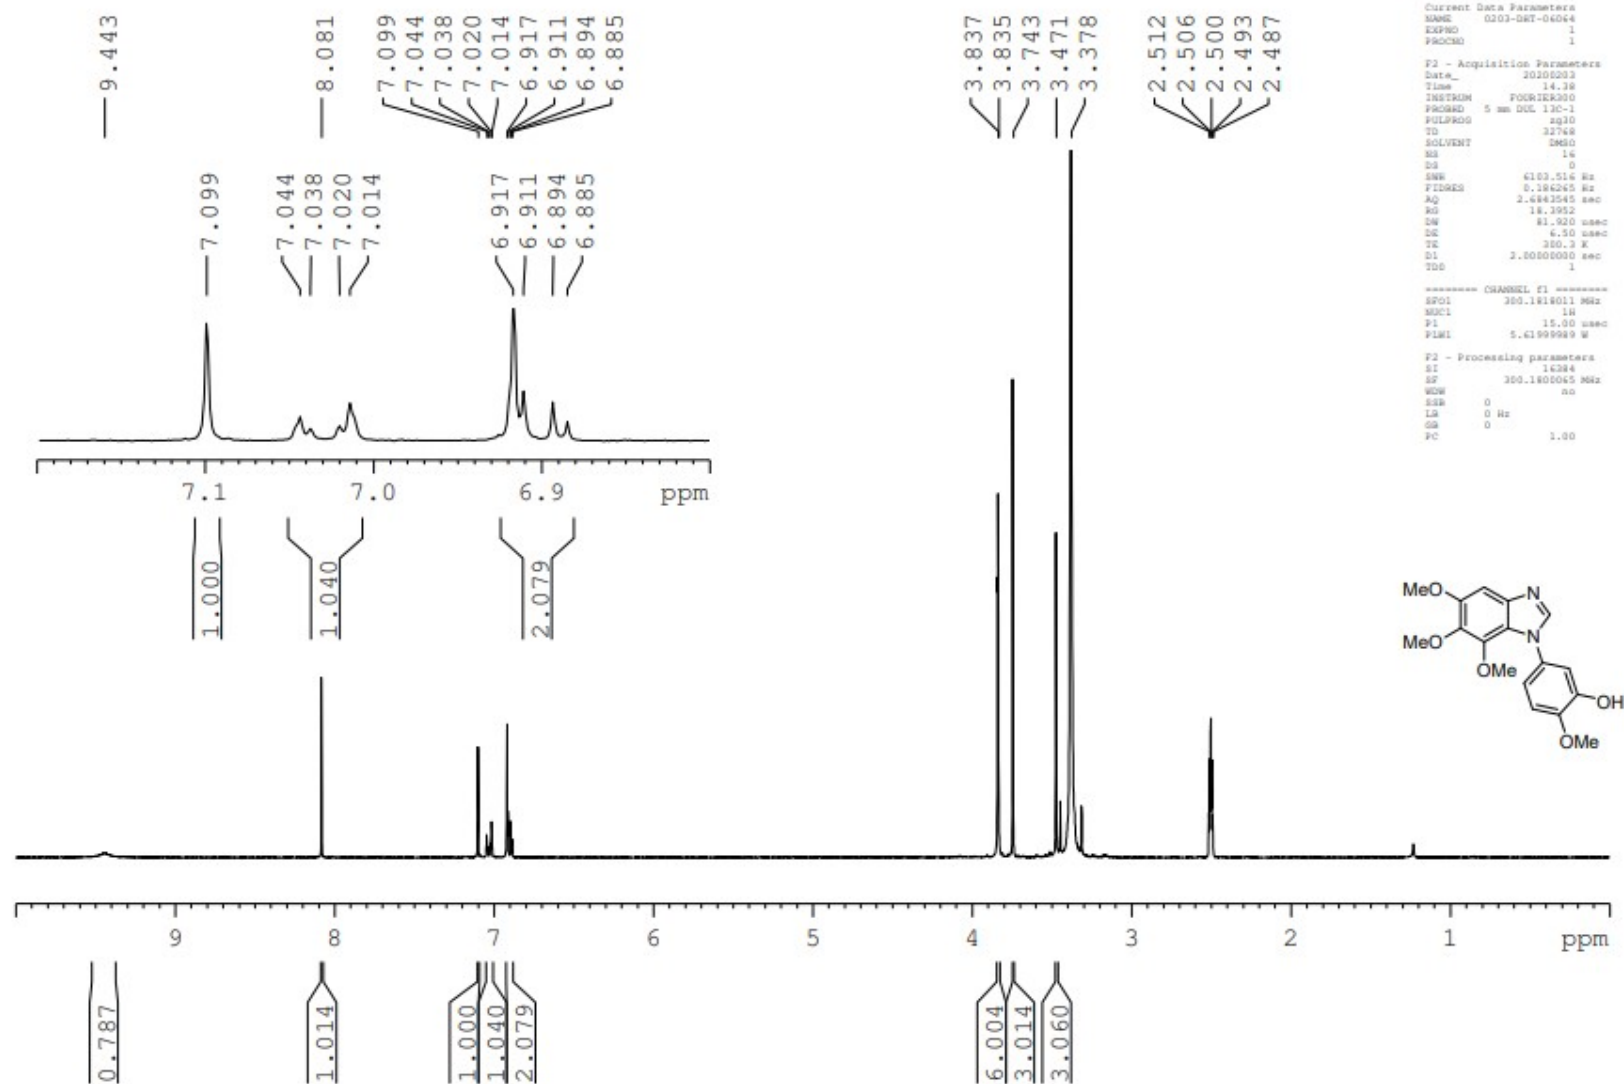

Current Data Parameters  
 NAME 0203-DAT-04044  
 EXPNO 1  
 PROCNO 1  
 F2 - Acquisition Parameters  
 Date\_ 20200203  
 Time 14.38  
 INSTRUM FOURIER300  
 PROGRAM 5 mm DUL 130-1  
 PULPROG zg30  
 TD 32768  
 SFO 300.136055  
 SOLVENT DMSO  
 NS 16  
 DS 0  
 SWH 6103.514 Hz  
 FIDRES 0.184545 Hz  
 AQ 2.6843545 sec  
 RG 18.3952  
 CW 81.820 usec  
 DE 6.50 usec  
 TE 300.2 K  
 D1 2.00000000 sec  
 TDS 1  
 ===== CHANNEL F1 =====  
 SFO1 300.136055 MHz  
 NUC1 1H  
 P1 15.00 usec  
 PL1 5.61999989 W  
 F2 - Processing parameters  
 SI 16384  
 SF 300.136055 MHz  
 WDW no  
 SSB 0  
 LB 0 Hz  
 GB 0  
 PC 1.00

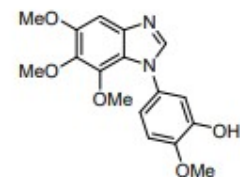

# <sup>1</sup>H Spectrum for compound 11

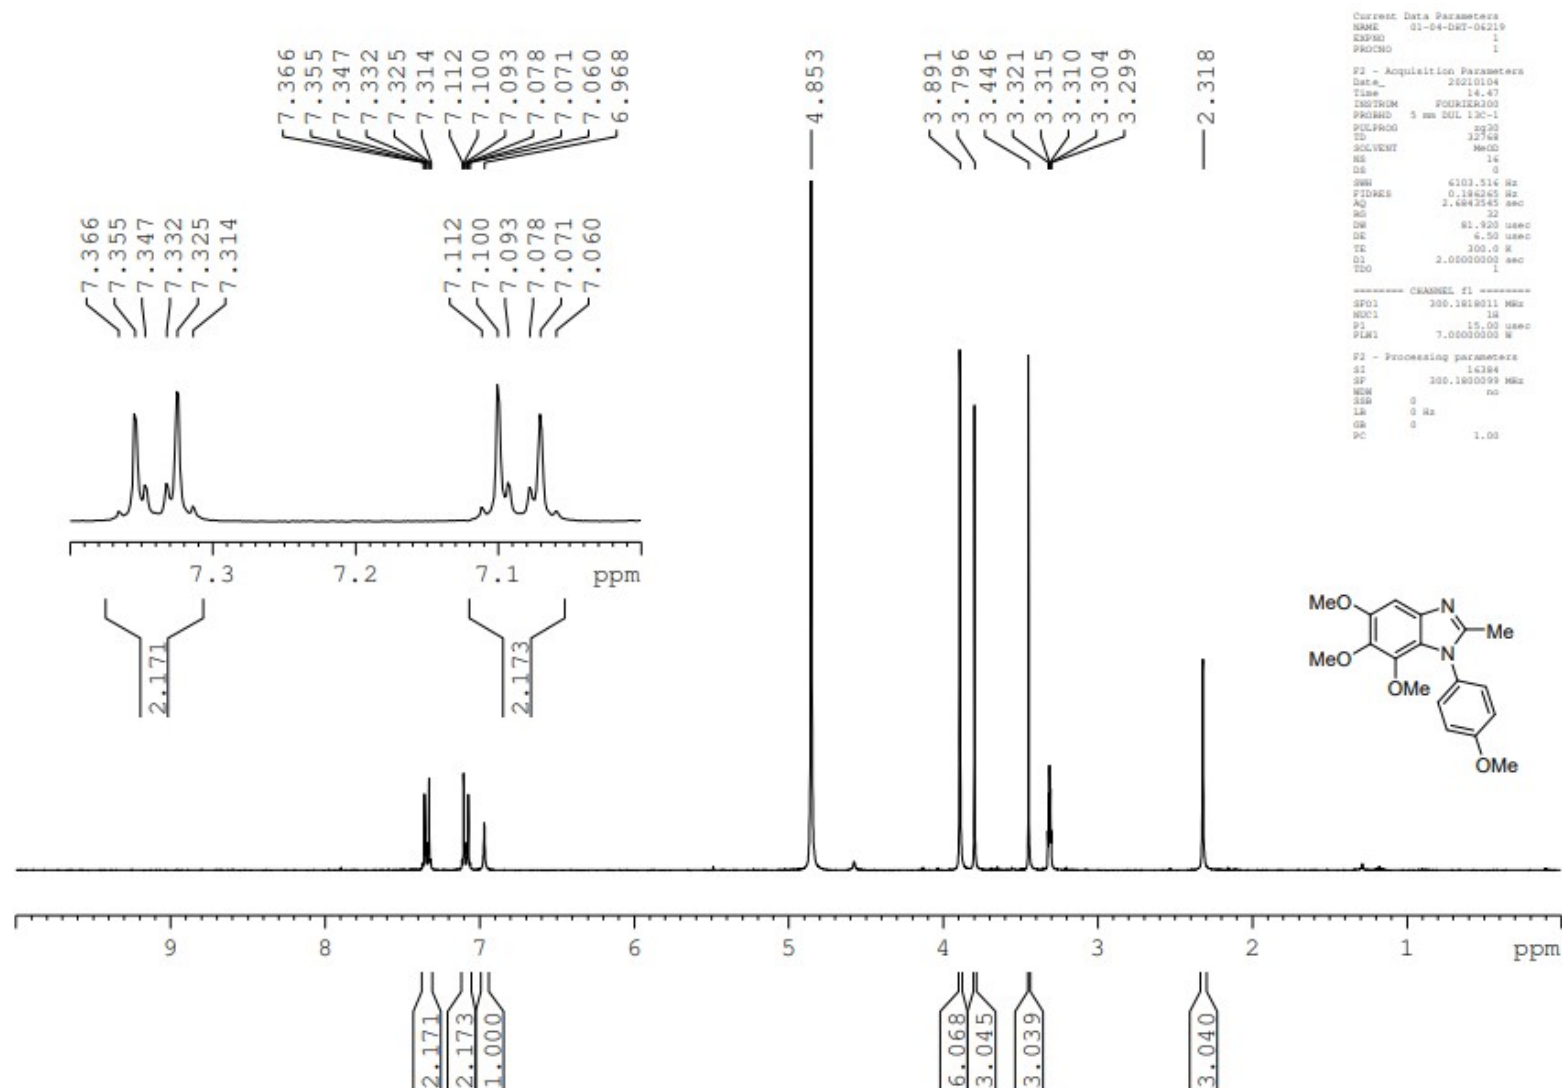

# <sup>1</sup>H Spectrum for compound 12

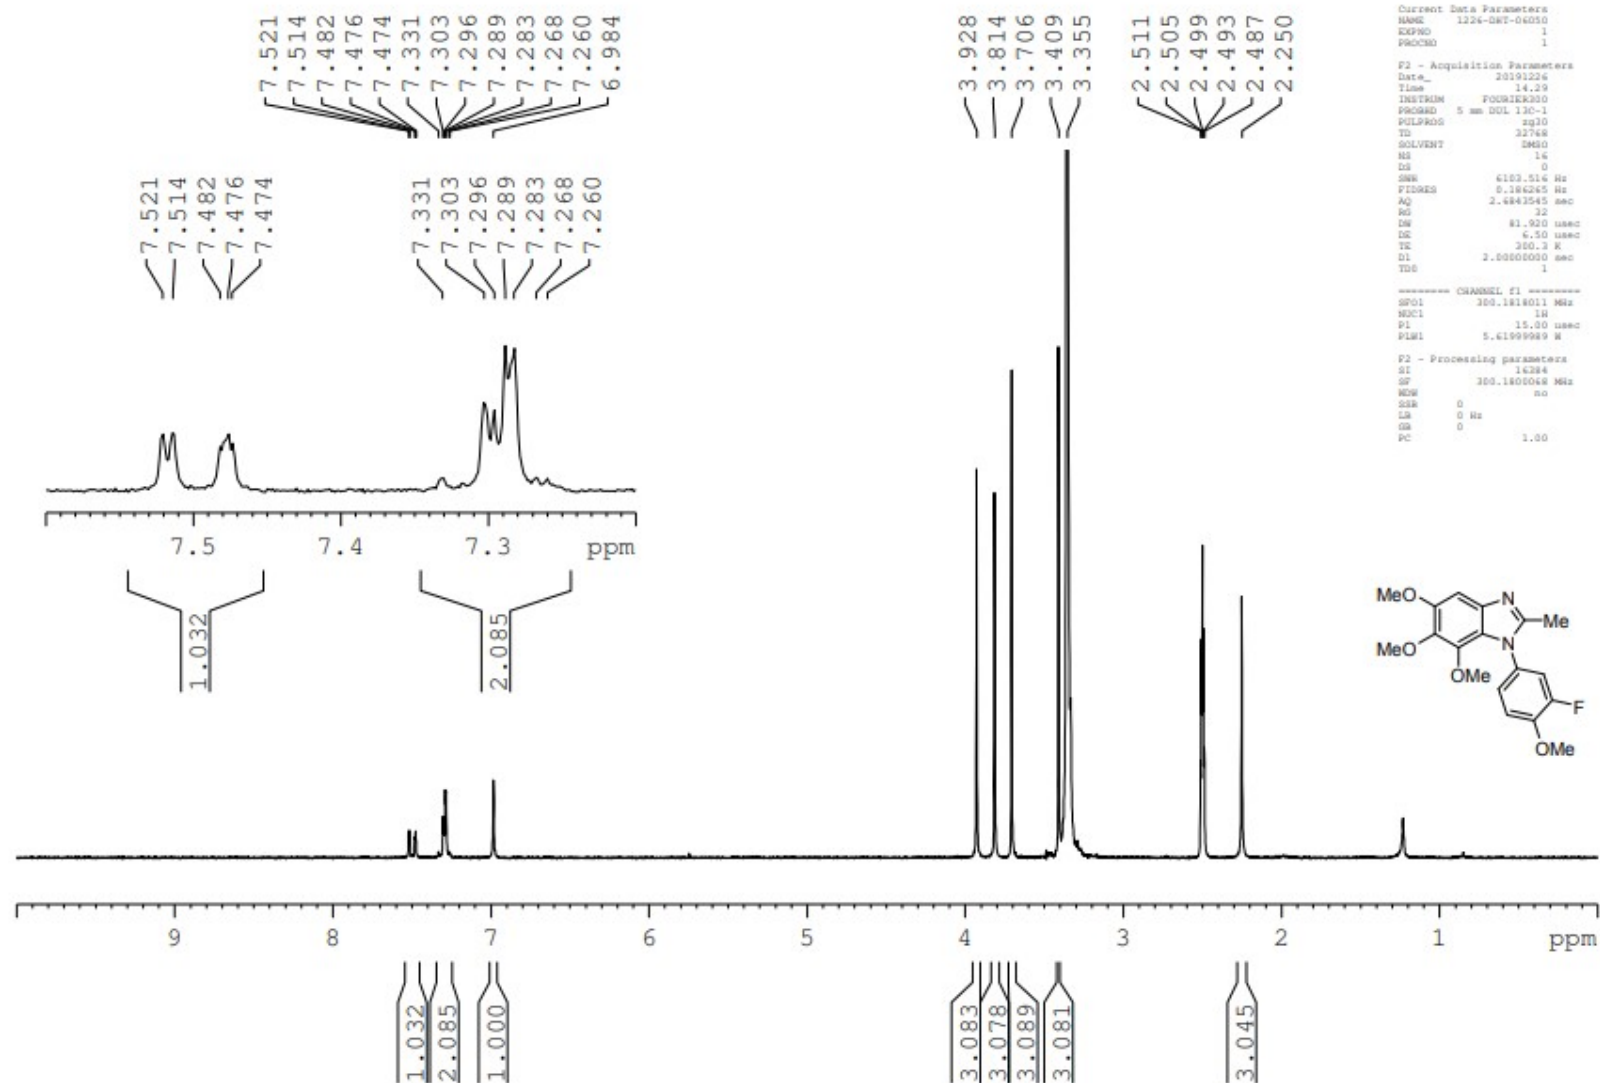

Current Data Parameters  
NAME 1224-087-04050  
EXPNO 1  
PROCNO 1

F2 - Acquisition Parameters  
Date\_ 20191226  
Time 14.29  
INSTRUM F001KX300  
PROBHD 5 mm DUL 130-1  
PULPROG zg30  
TD 32768  
SOLVENT DMF0  
NS 16  
DS 0  
SWH 6102.516 Hz  
FIDRES 0.186245 Hz  
AQ 2.4843545 sec  
RG 32  
DW 81.920 usec  
DE 4.50 usec  
TE 300.2 K  
D1 2.00000000 sec  
D0 1

===== CHANNEL f1 =====  
NUC1 13C  
P1 15.00 usec  
PLW1 5.61999989 M

F2 - Processing parameters  
SI 16384  
SF 300.1400048 MHz  
WDW no  
SSB 0  
LB 0 Hz  
GB 0  
PC 1.00

# <sup>1</sup>H Spectrum for compound 13

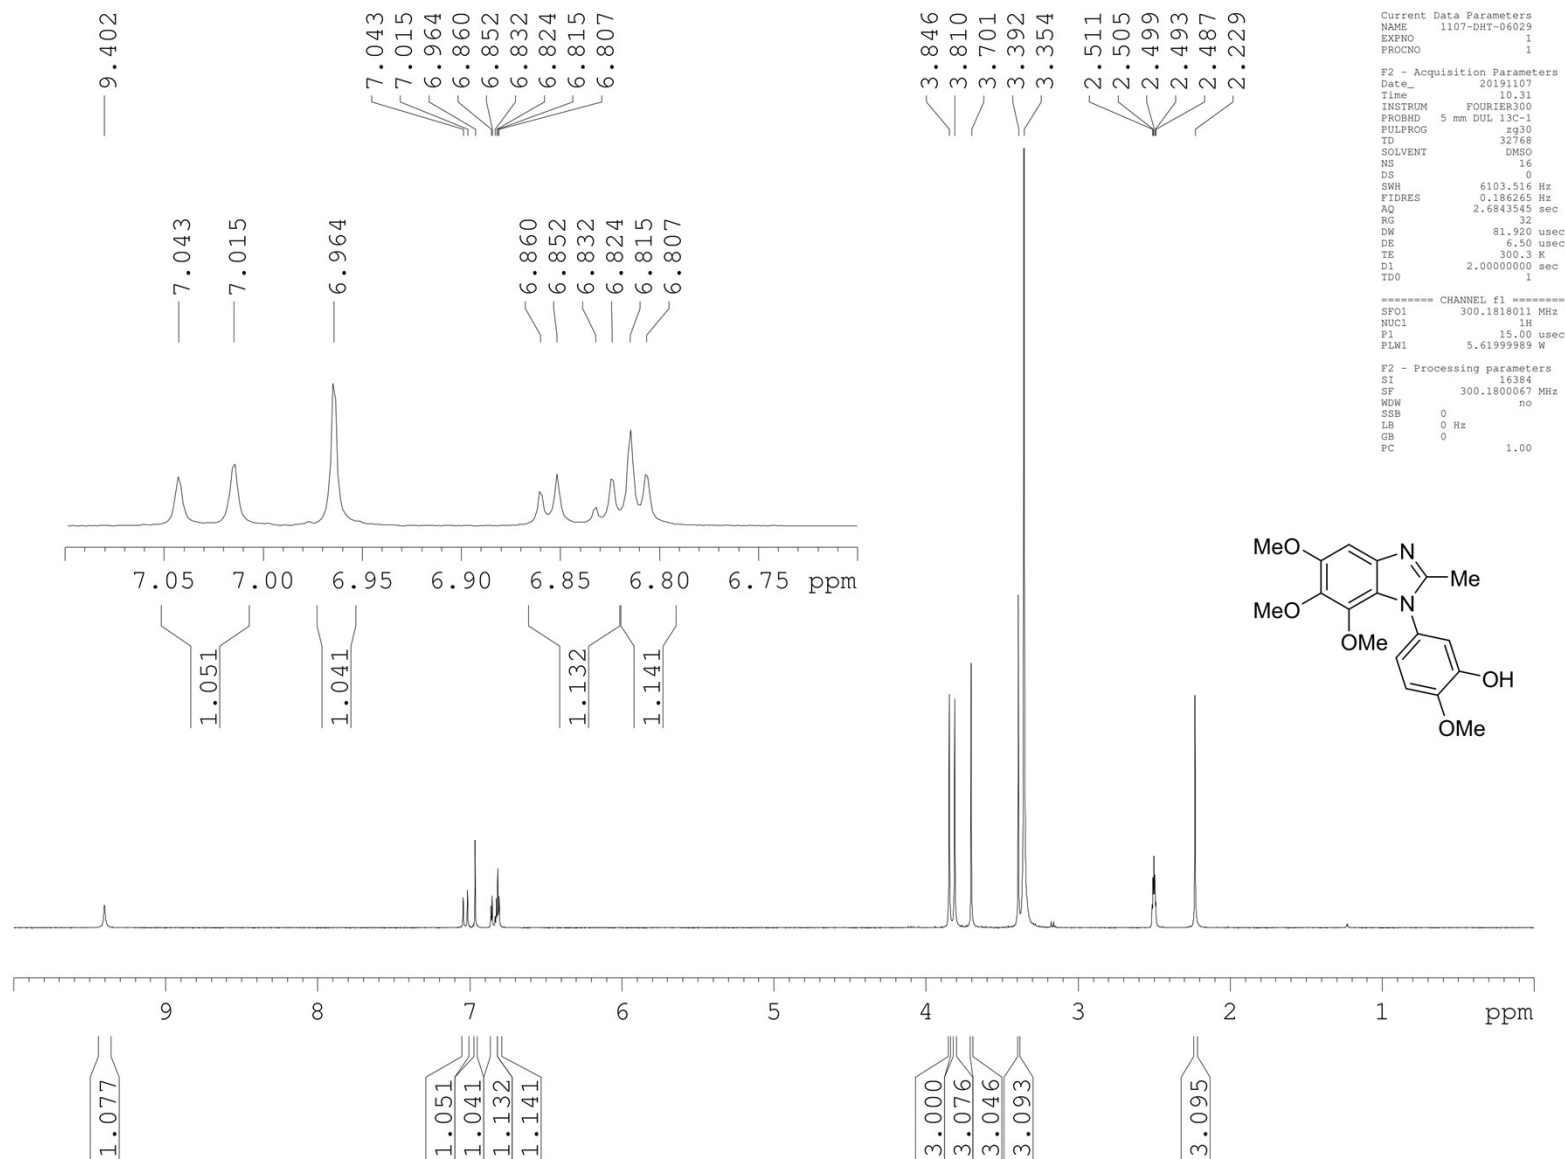

Current Data Parameters  
NAME 1107-DHT-06029  
EXPNO 1  
PROCNO 1

F2 - Acquisition Parameters  
Date\_ 20191107  
Time 10.31  
INSTRUM FOURIER300  
PROBHD 5 mm DUL 13C-1  
PULPROG zg30  
TD 32768  
SOLVENT DMSO  
NS 16  
DS 0  
SWH 6103.516 Hz  
FIDRES 0.186265 Hz  
AQ 2.6843545 sec  
RG 32  
DW 81.920 usec  
DE 6.50 usec  
TE 300.3 K  
D1 2.00000000 sec  
TD0 1

===== CHANNEL f1 =====  
SF01 300.1818011 MHz  
NUC1 1H  
P1 15.00 usec  
PLW1 5.61999989 W

F2 - Processing parameters  
SI 16384  
SF 300.1800067 MHz  
WDW no  
SSB 0  
LB 0 Hz  
GB 0  
PC 1.00

# <sup>1</sup>H Spectrum for compound 14

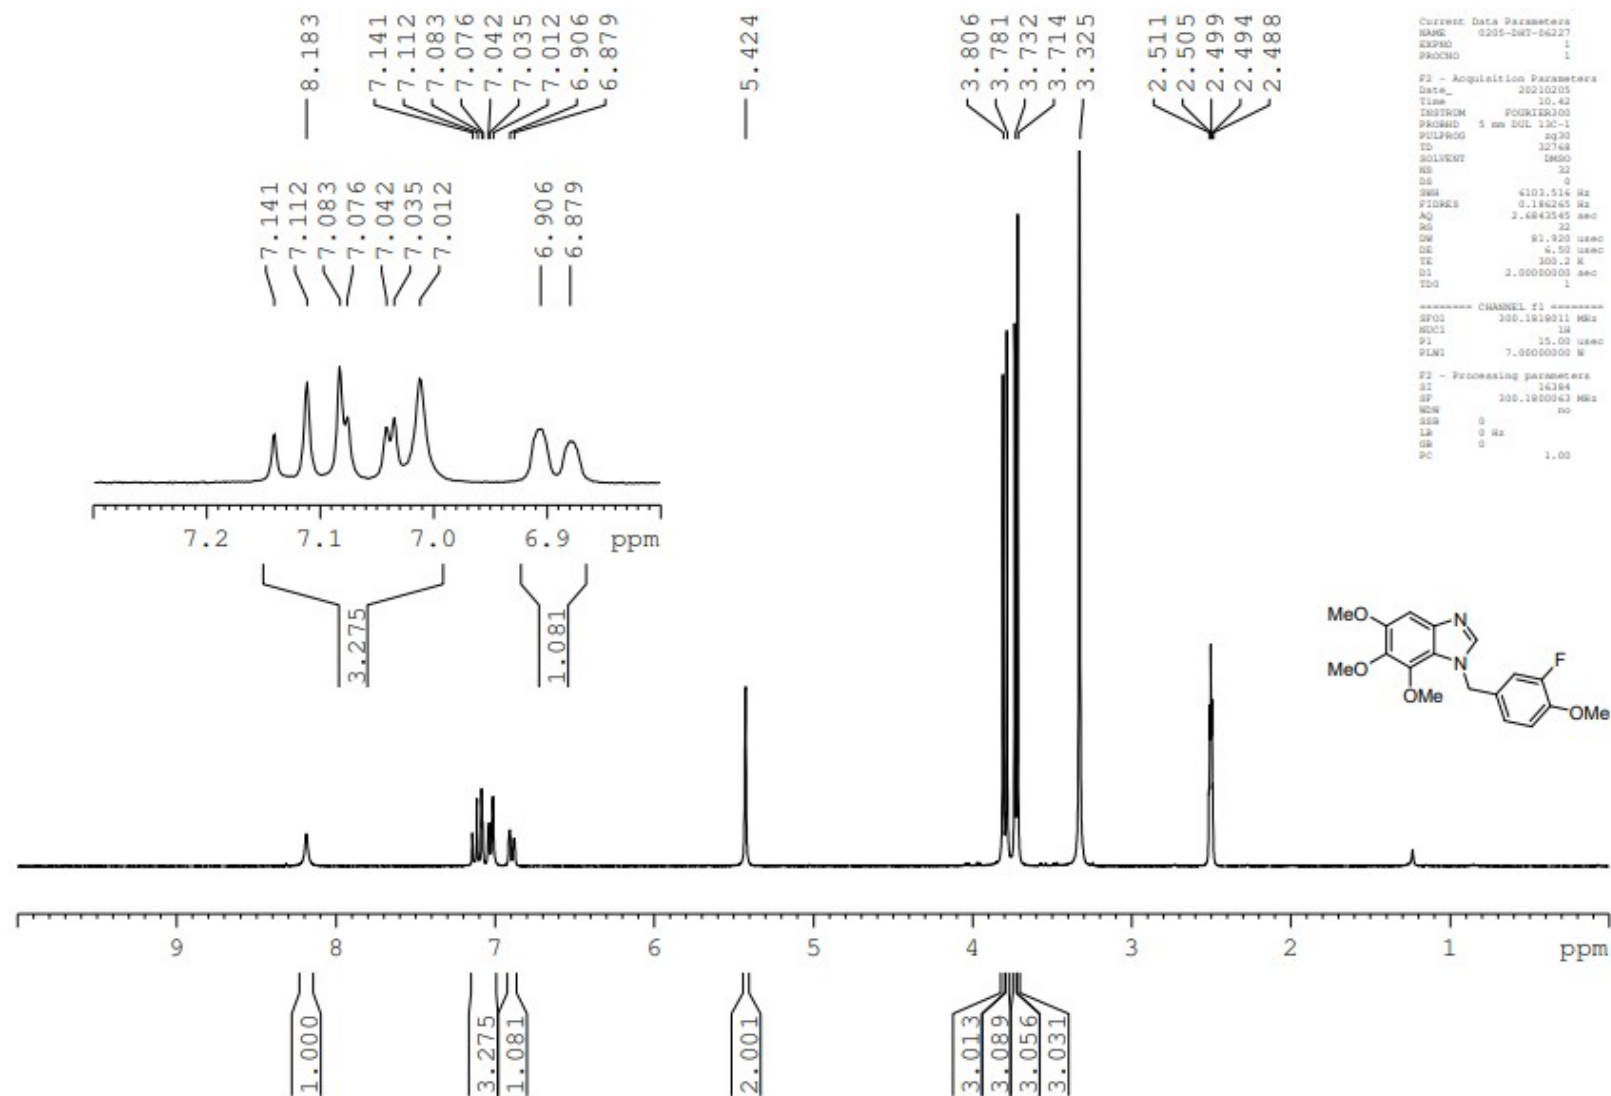

# <sup>1</sup>H Spectrum for compound 15

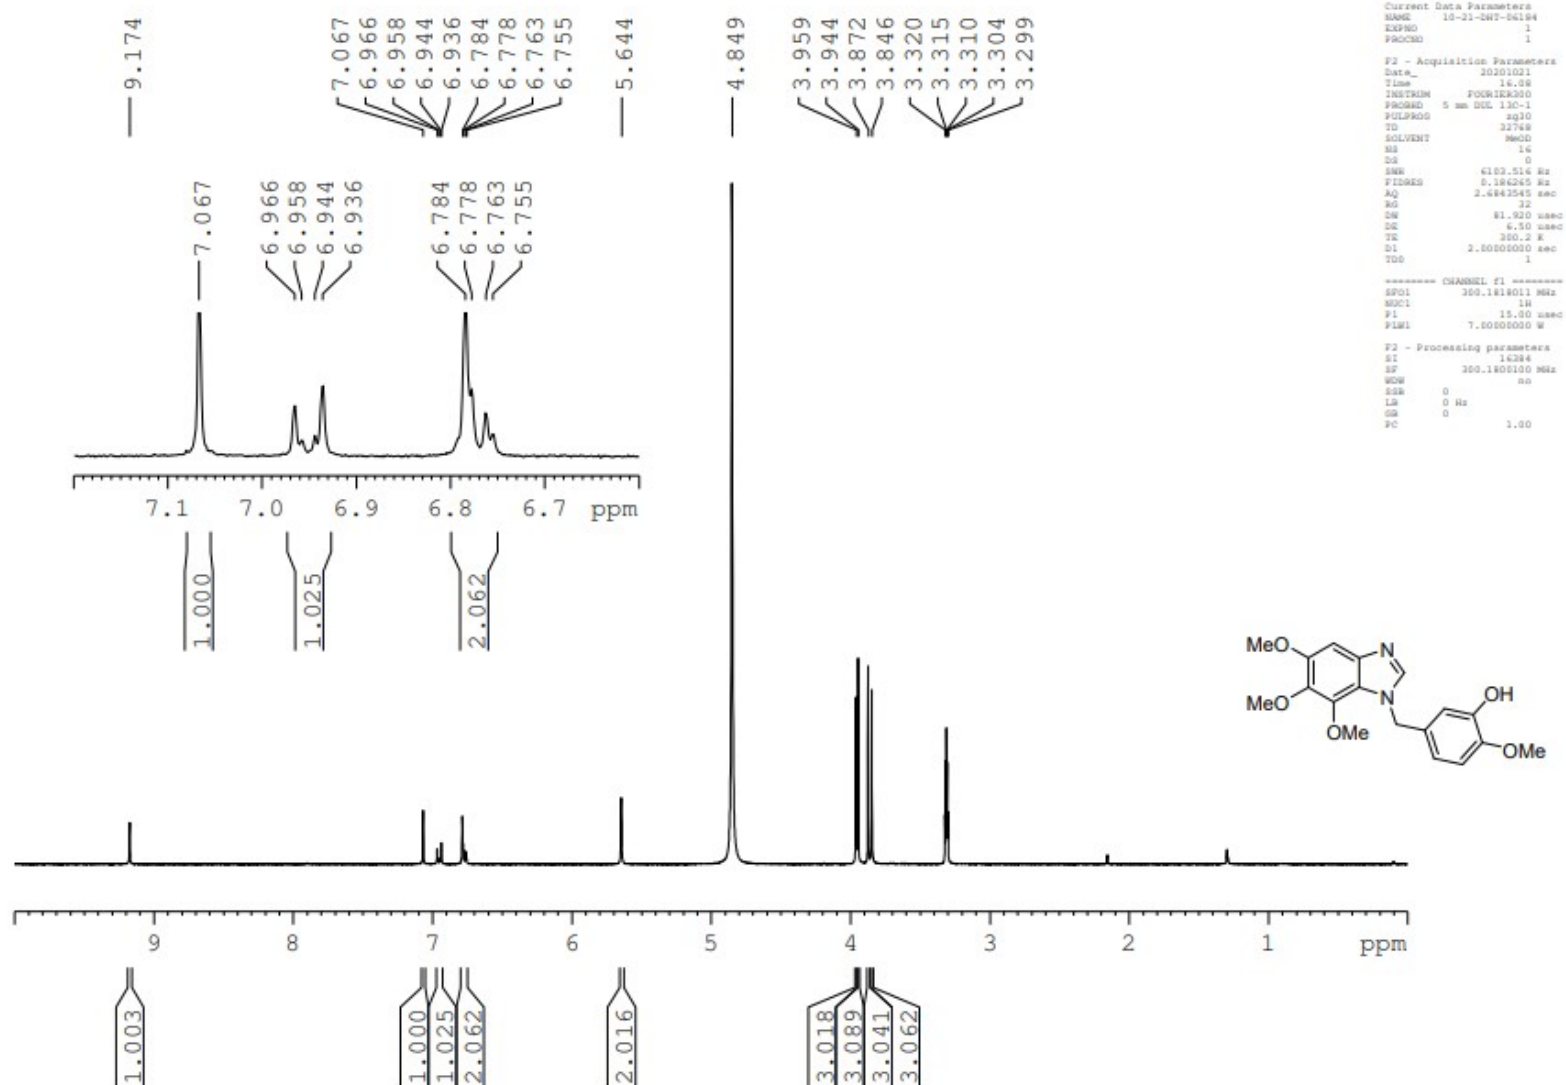

# <sup>13</sup>C Spectrum for compound 4

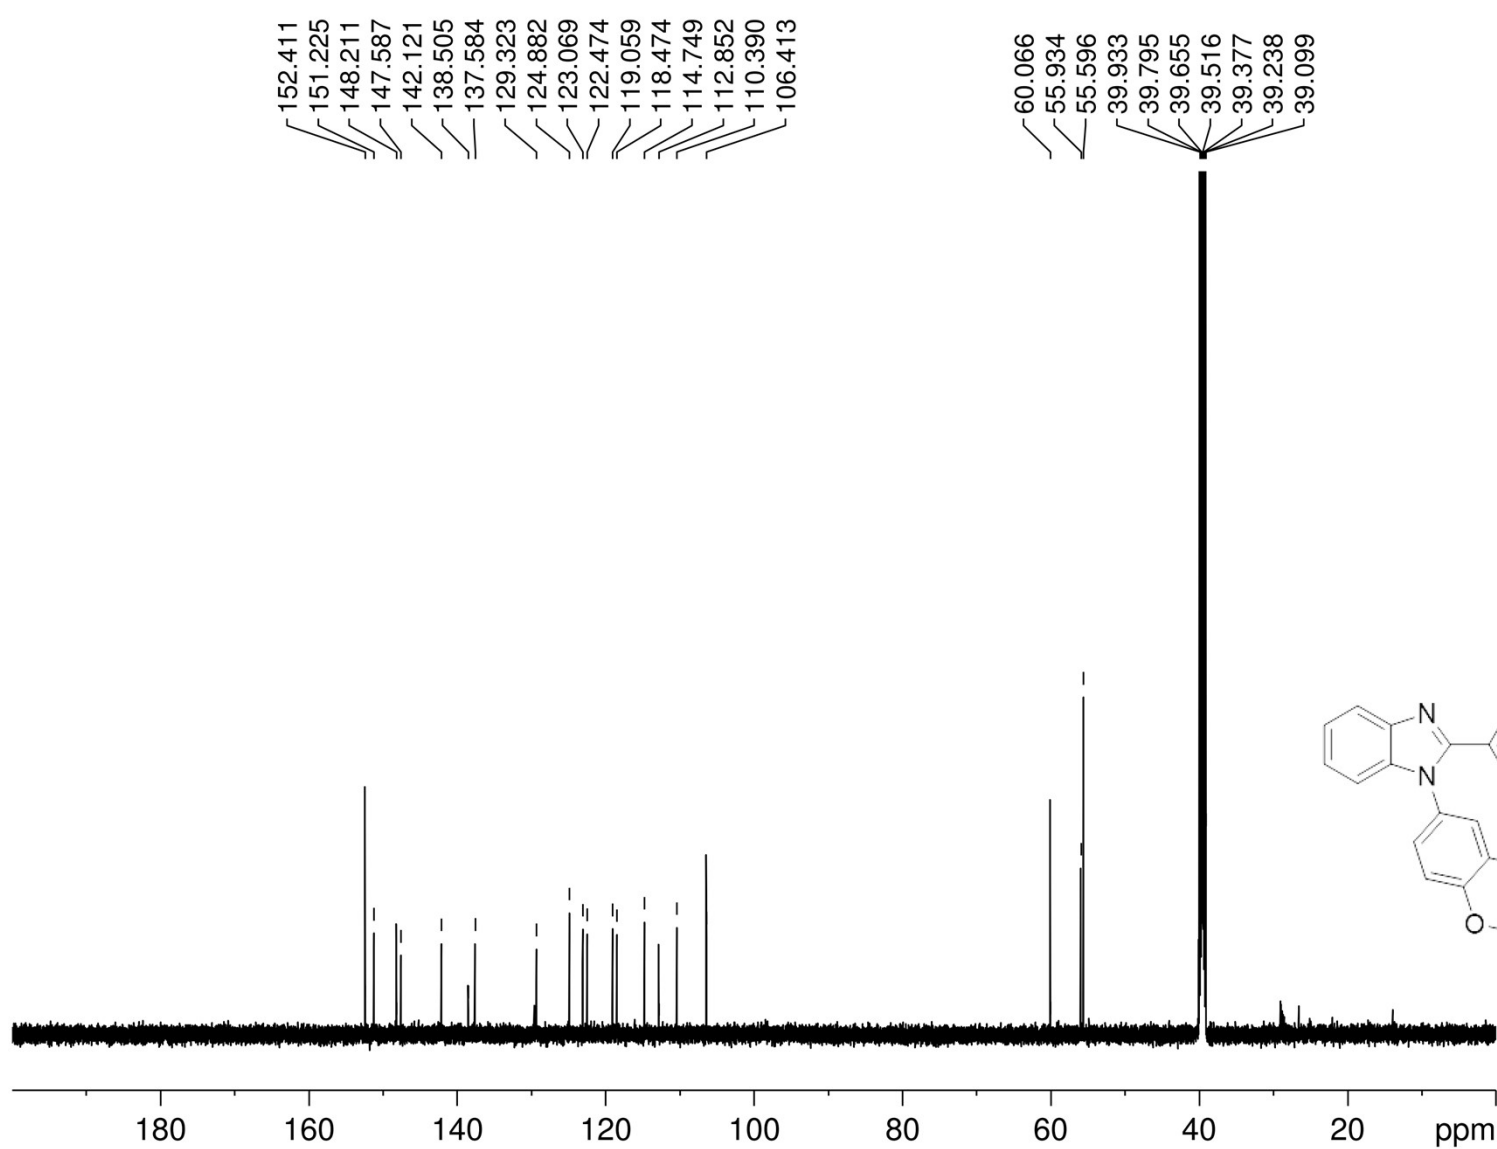

Current Data Parameters  
NAME 0705-61-222-600  
EXPNO 2  
PROCNO 1

F2 - Processing parameters  
SI 65536  
SF 150.8273086 MHz  
WDW EM  
SSB 0  
LB 0.30 Hz  
GB 0  
PC 1.00

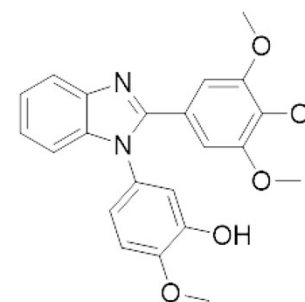

# <sup>13</sup>C Spectrum for compound 5

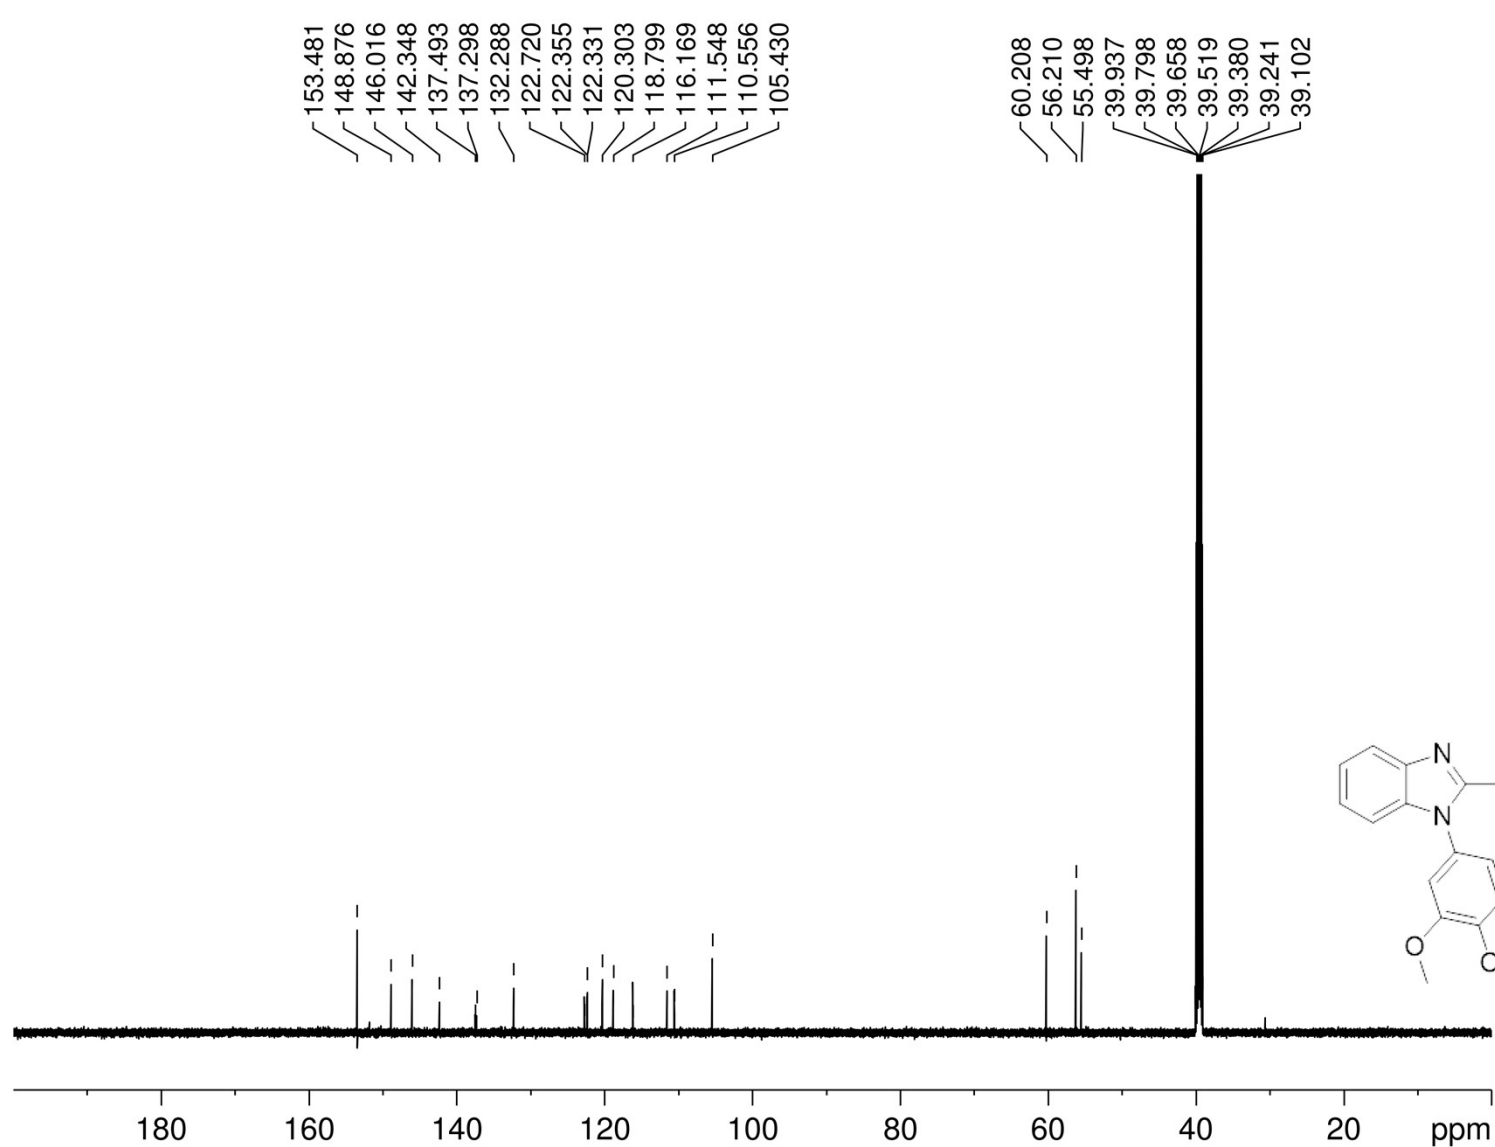

Current Data Parameters  
NAME CARBON\_20190705\_01  
EXPNO 2  
PROCNO 1  
  
F2 - Processing parameters  
SI 65536  
SF 150.8273097 MHz  
WDW no  
SSB 0  
LB 0 Hz  
GB 0  
PC 1.00

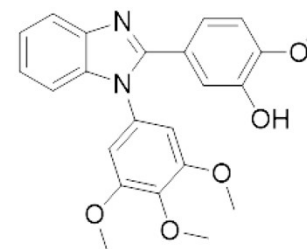

# <sup>13</sup>C Spectrum for compound 6

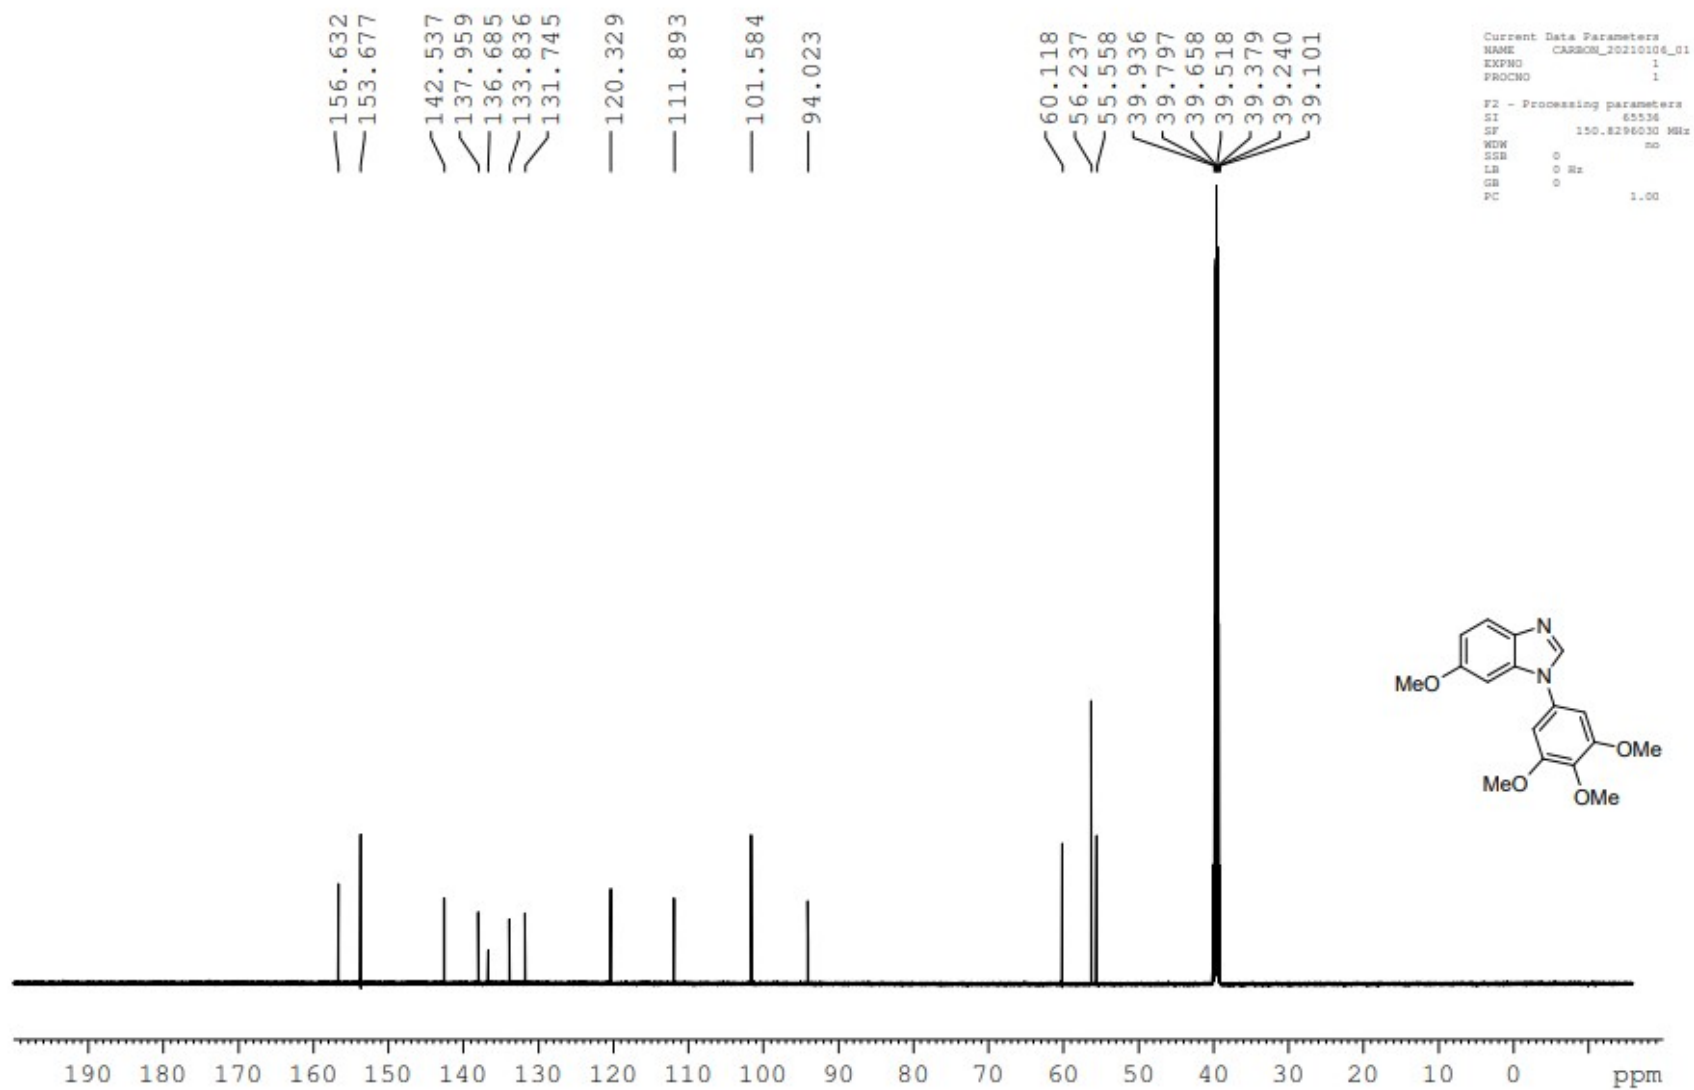

# <sup>13</sup>C Spectrum for compound 7

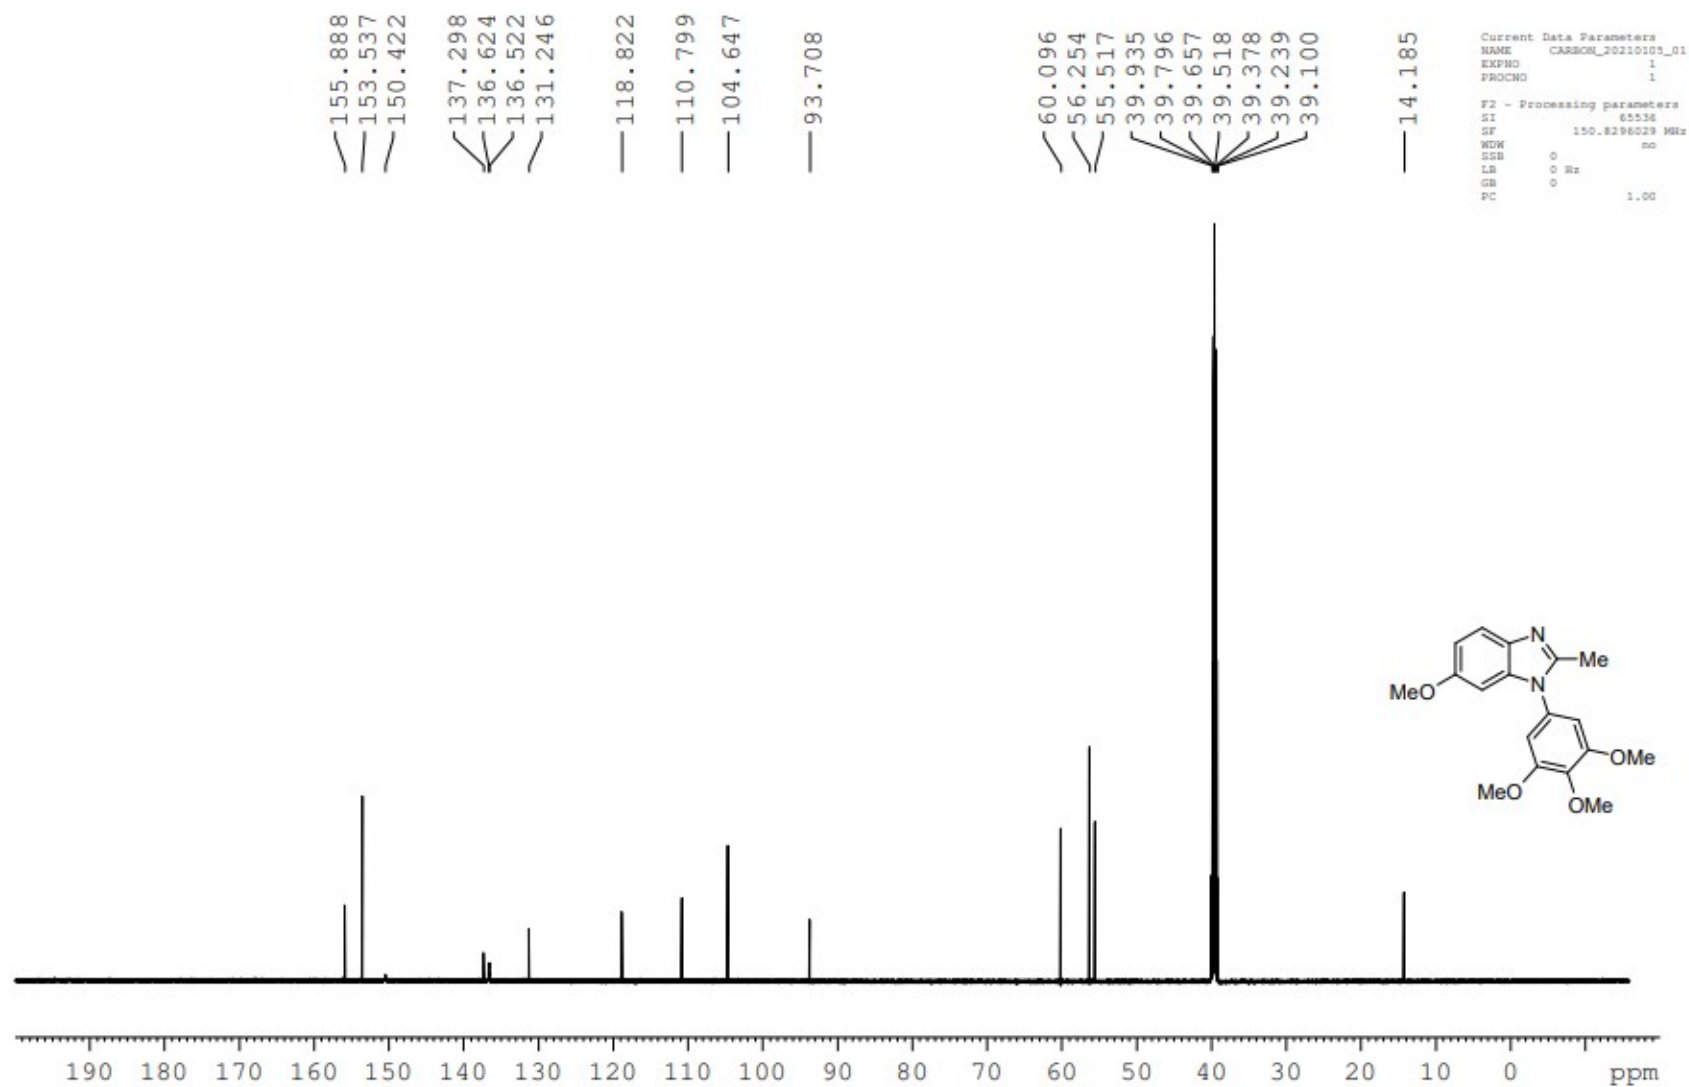

# <sup>13</sup>C Spectrum for compound 8

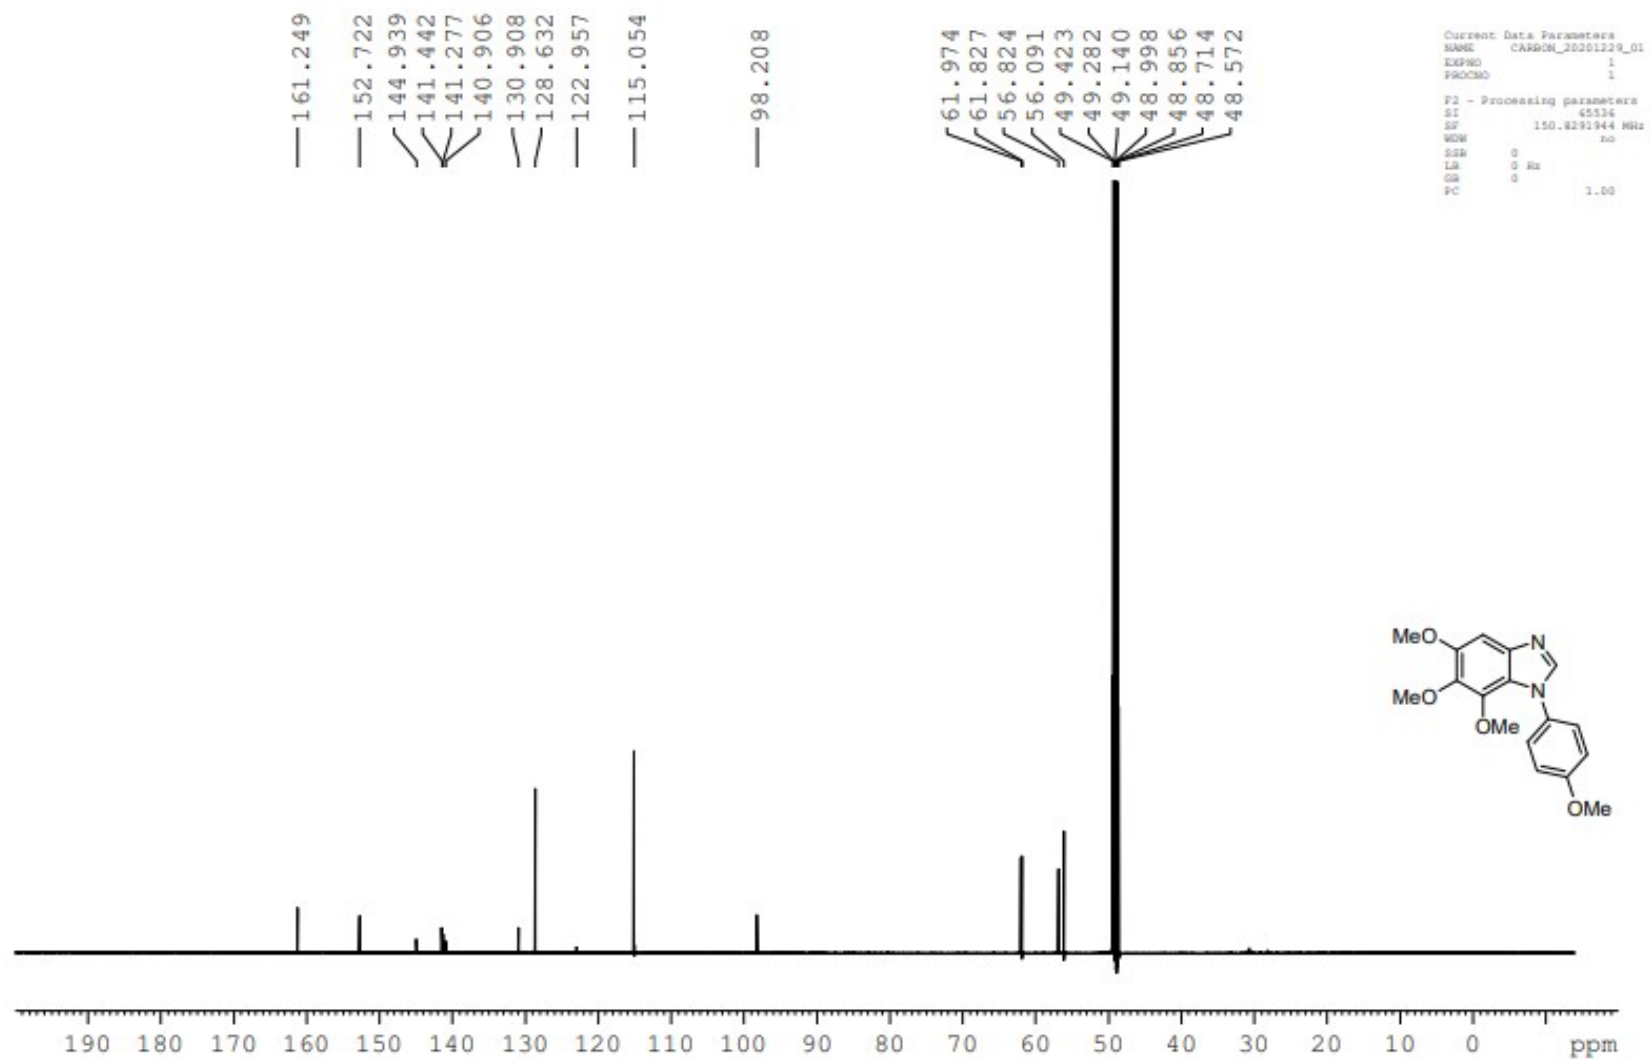

# <sup>13</sup>C Spectrum for compound 9

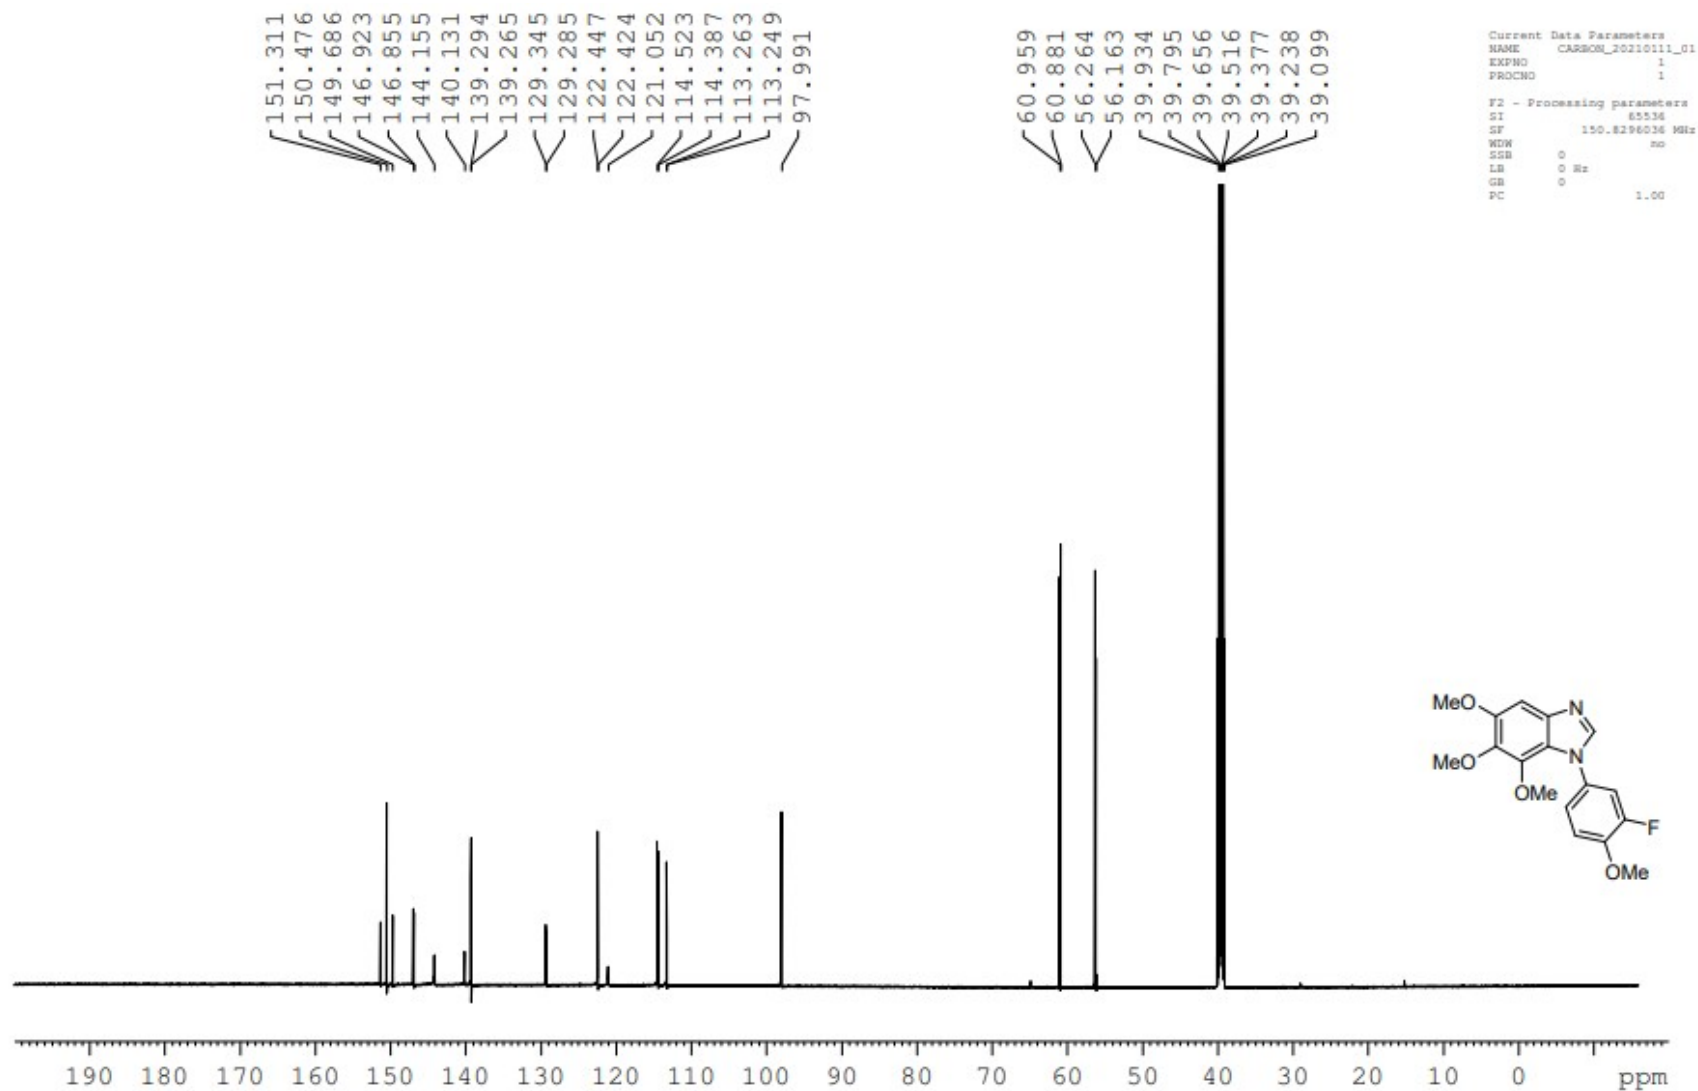

# <sup>13</sup>C Spectrum for compound 10

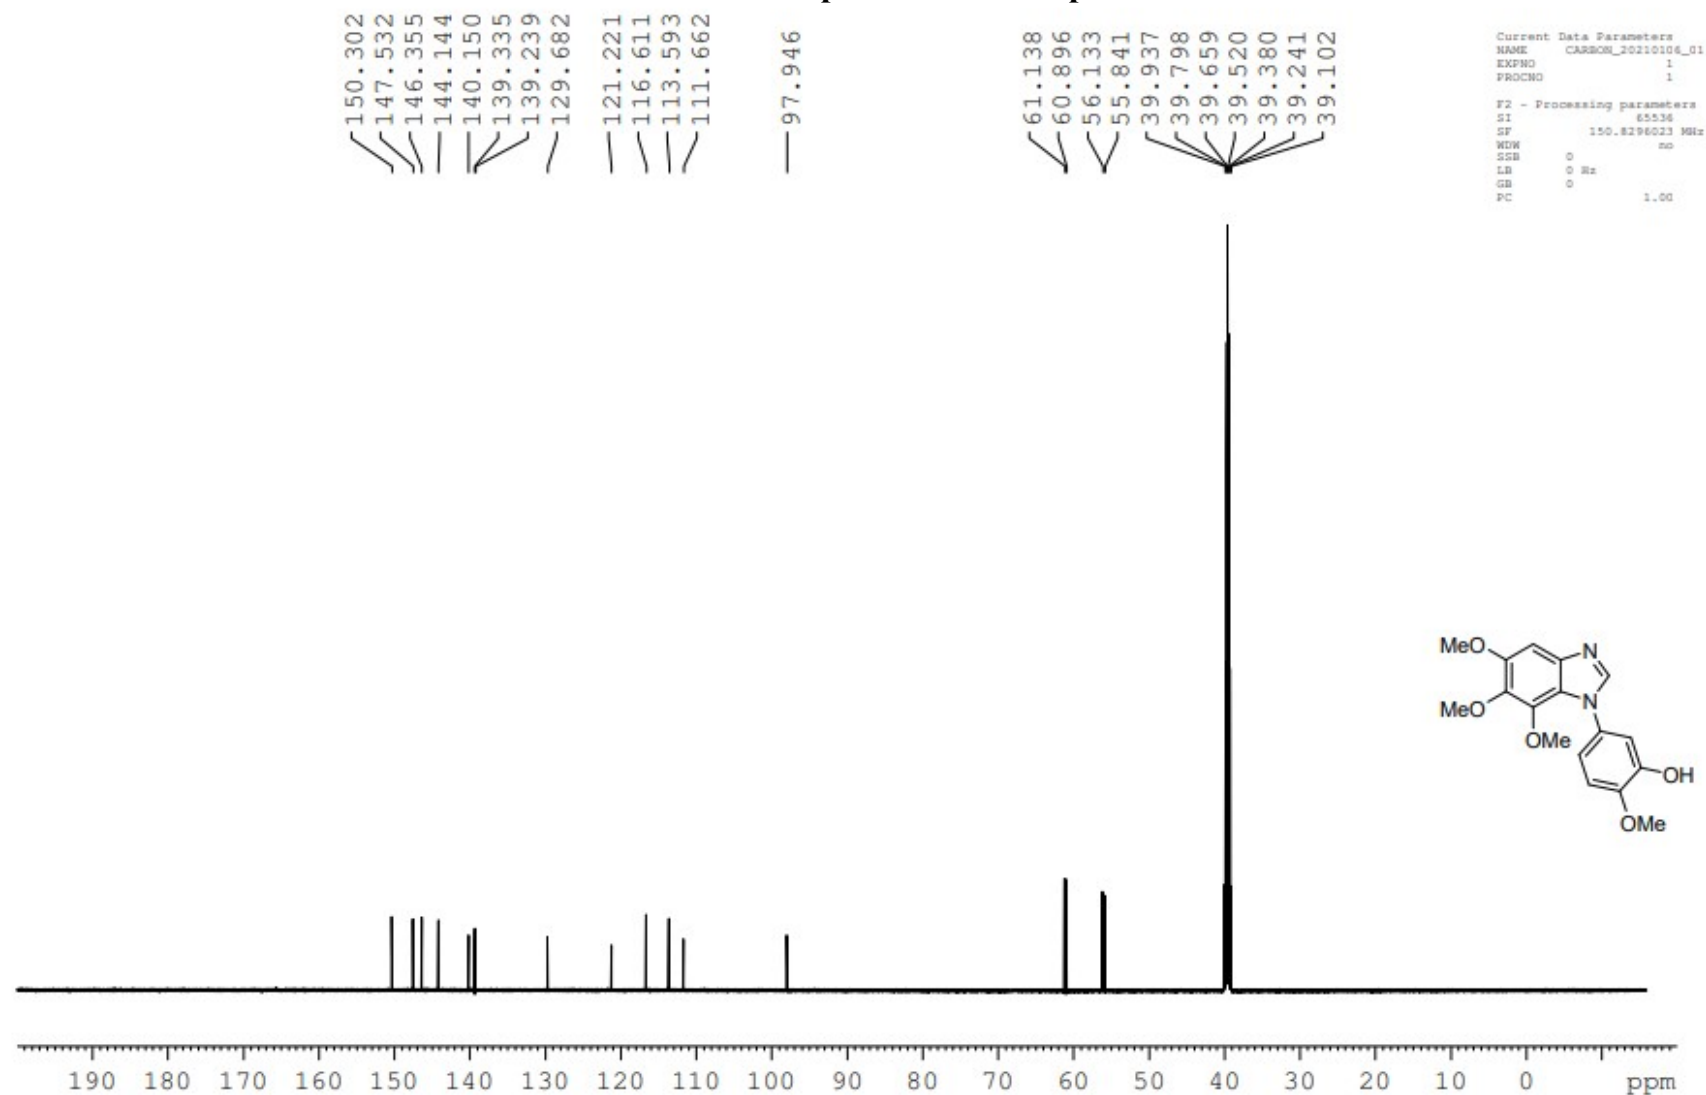

# <sup>13</sup>C Spectrum for compound 11

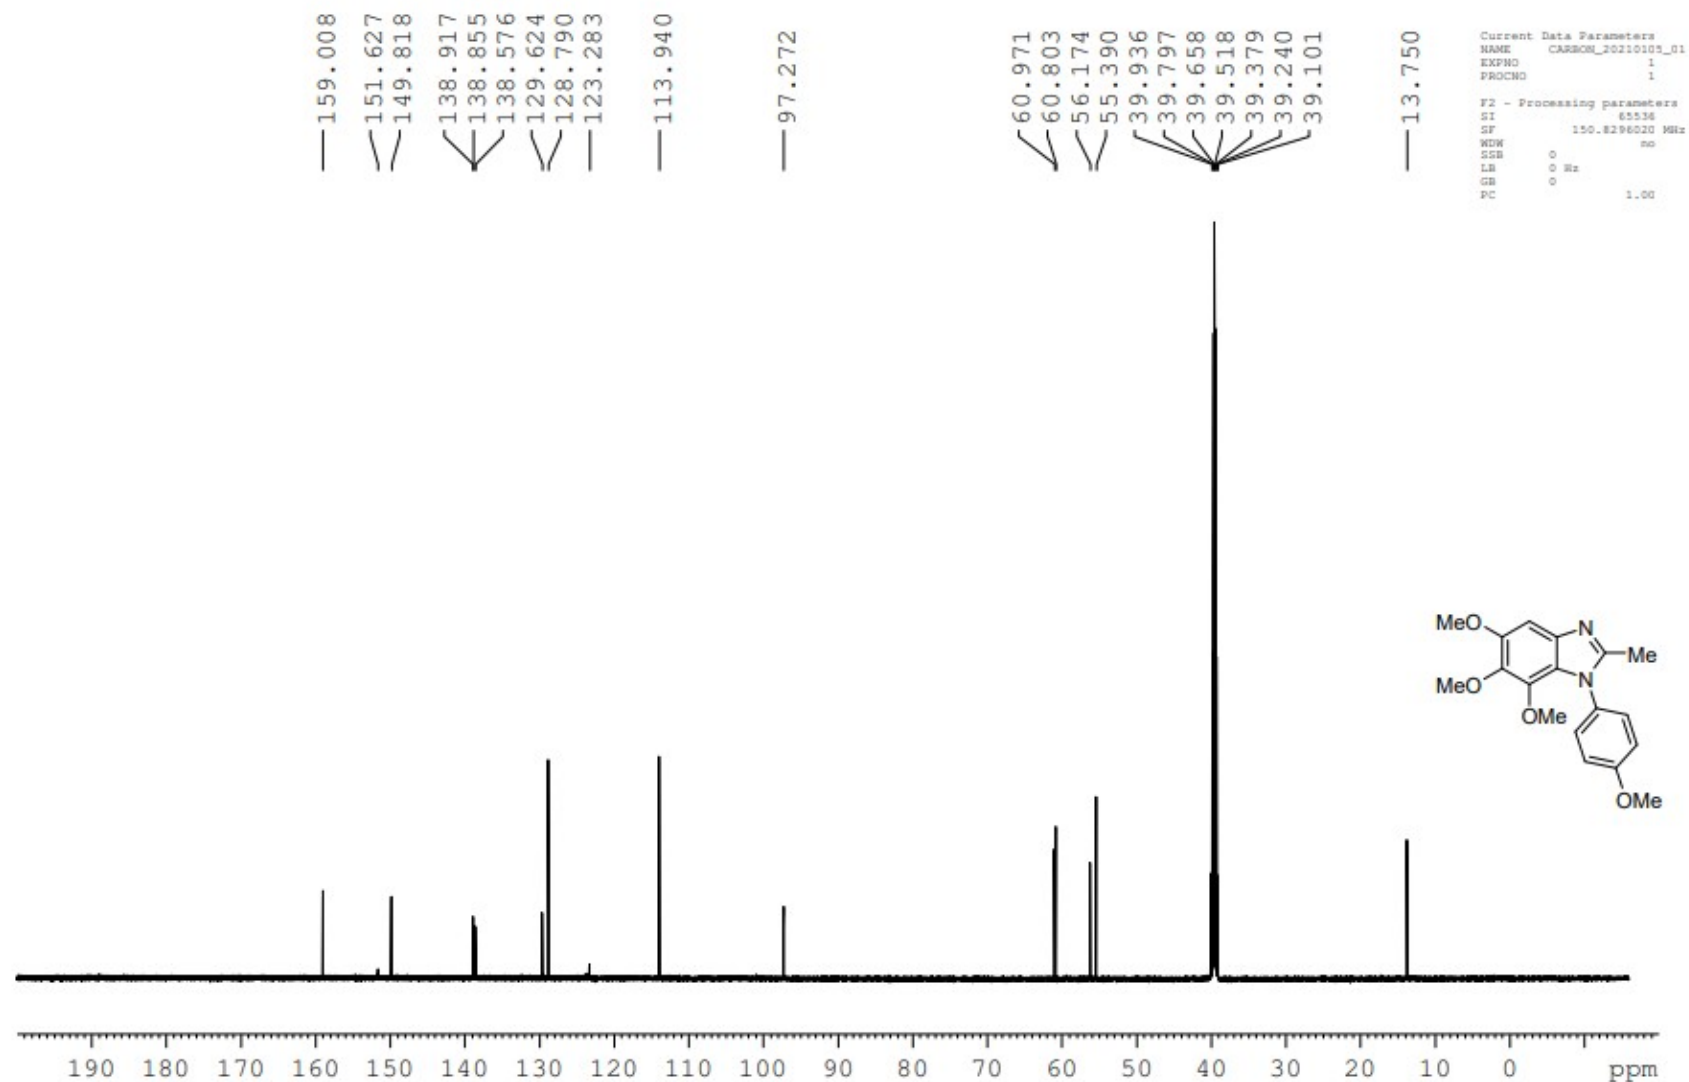

# <sup>13</sup>C Spectrum for compound12

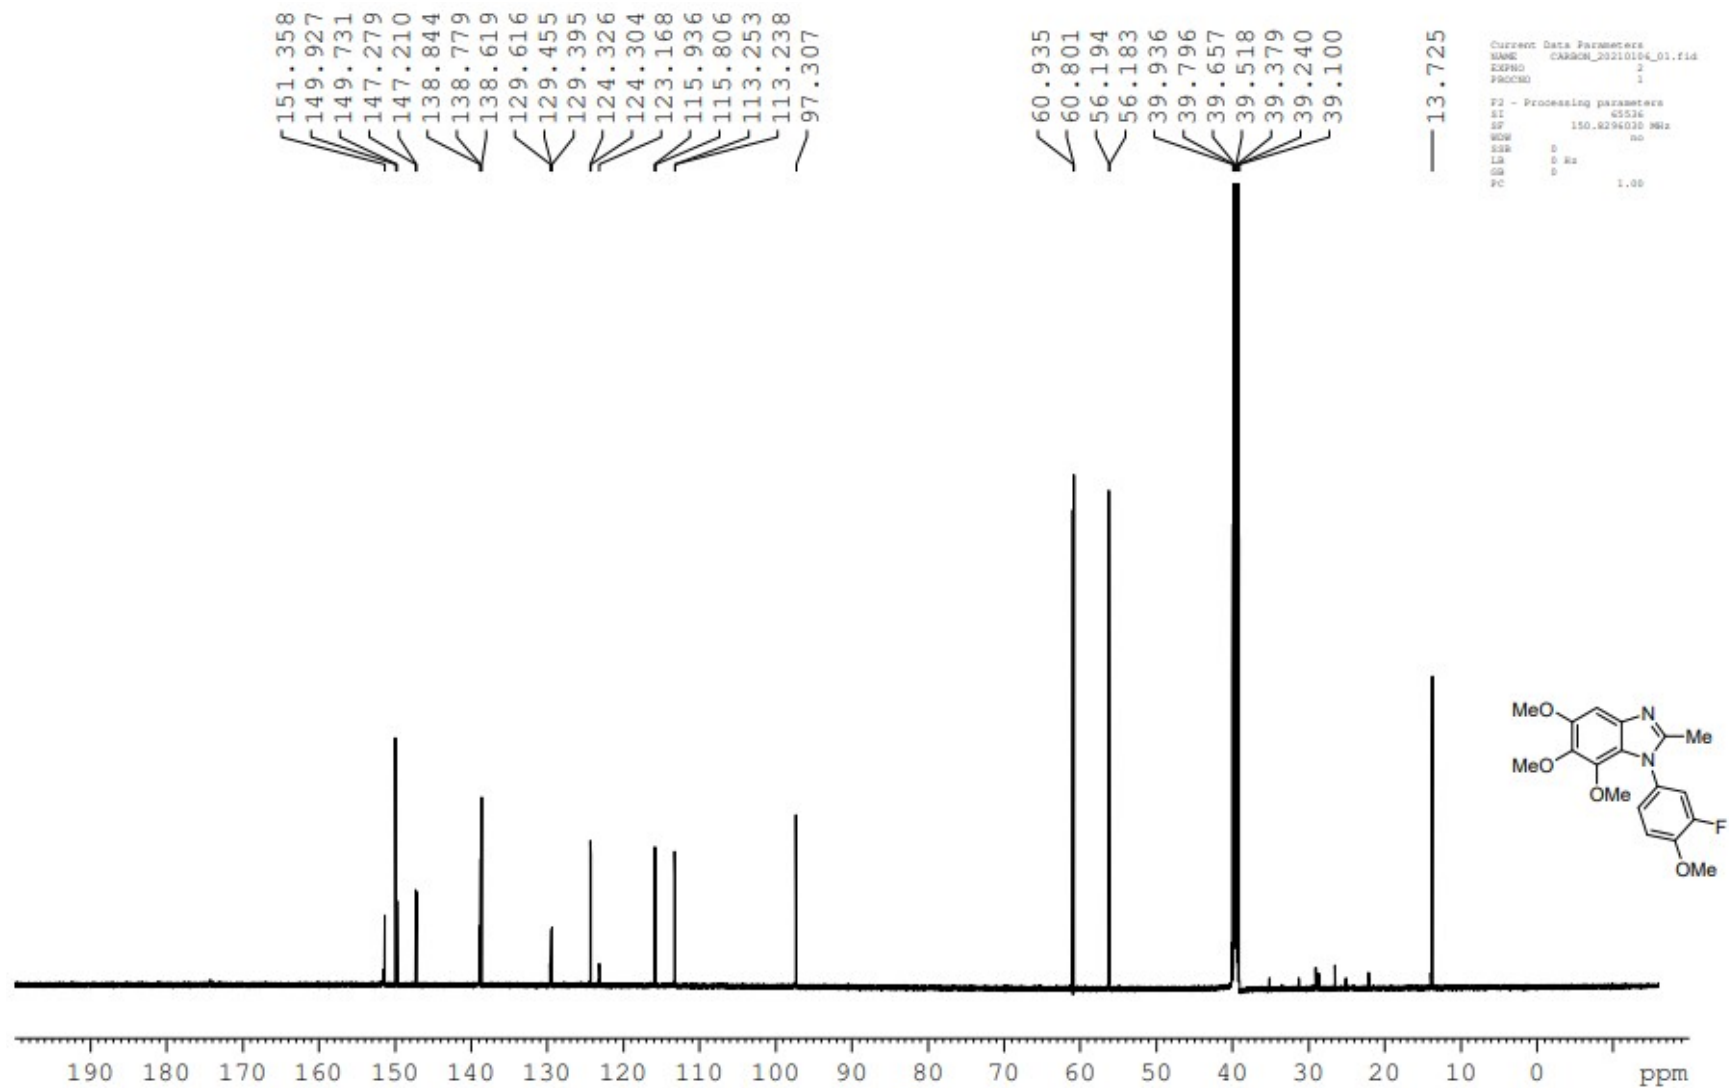

# <sup>13</sup>C Spectrum for compound 13

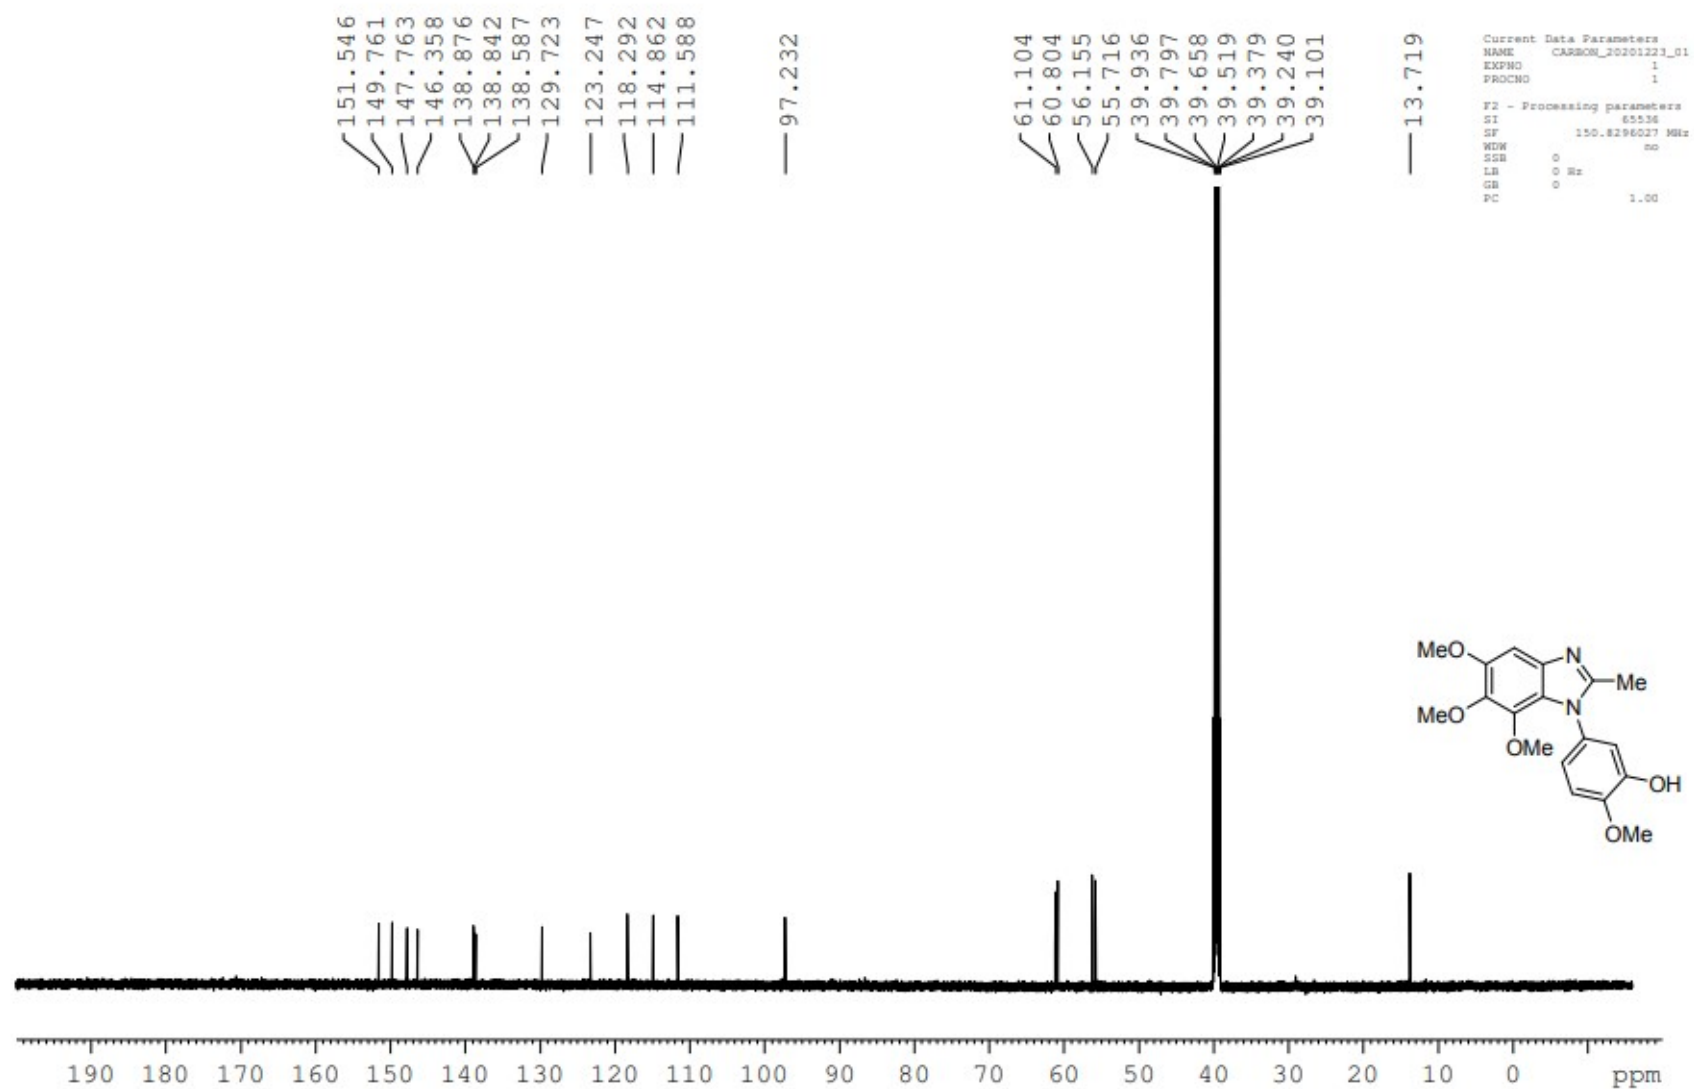

# <sup>13</sup>C Spectrum for compound 14

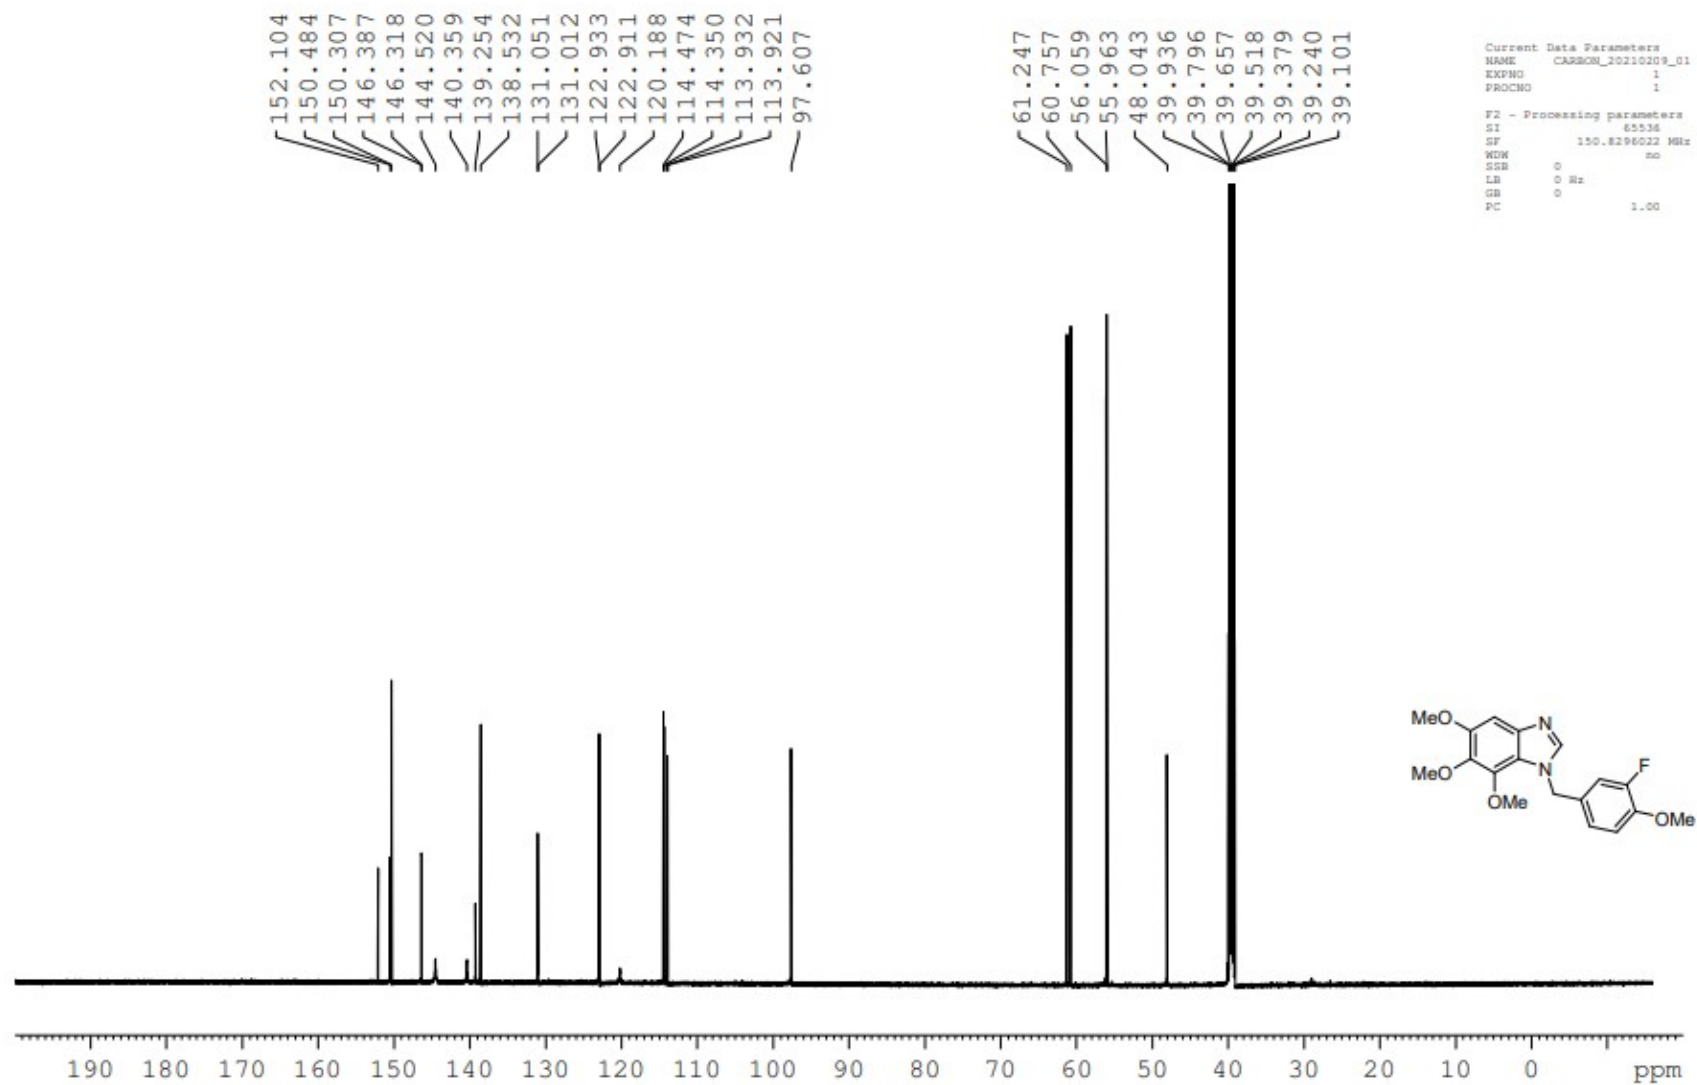

# <sup>13</sup>C Spectrum for compound 15

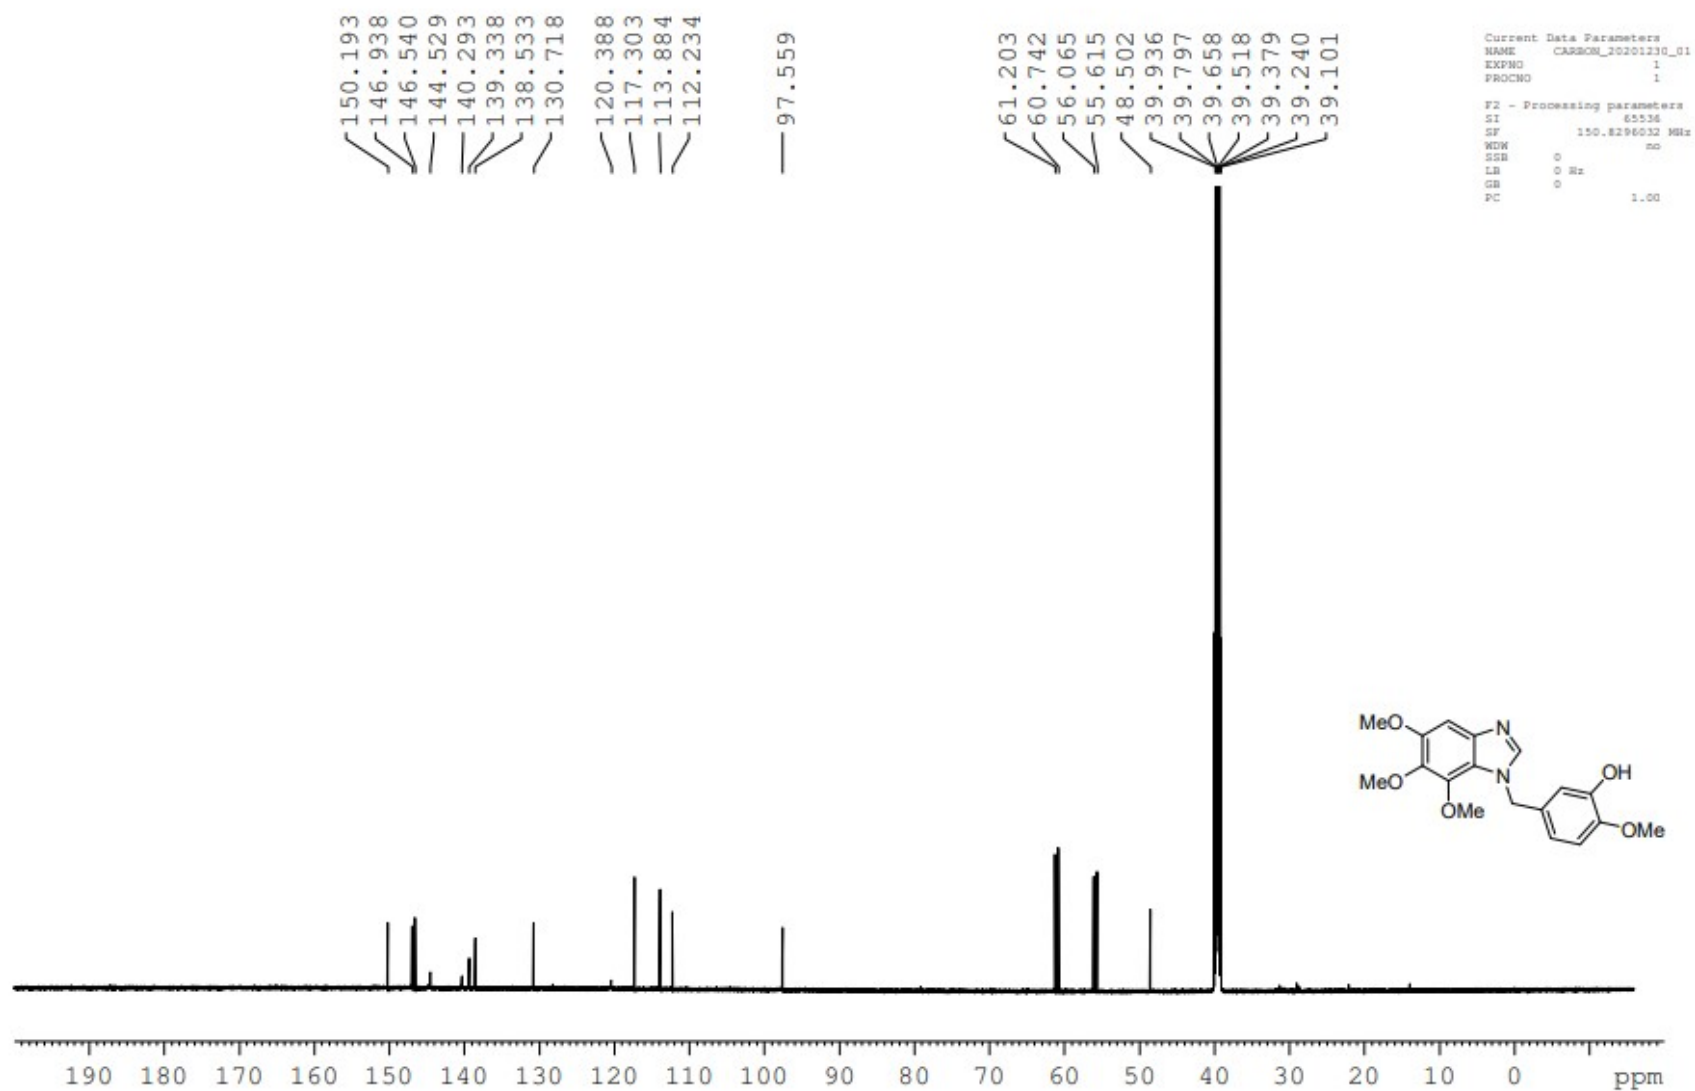

Supplement: d3ra01927f1.pdf [file d3ra01927f1.pdf]
